# Supplementary material for: Enhanced reduction of C–N multiple bonds using sodium borohydride and an amorphous nickel catalyst
Source: Royal Society of Chemistry journal article supplement (doi:10.1039/c1ob06471a), 2011-10-03
Supplement: c1ob06471a.pdf [file c1ob06471a.pdf]

## Supporting Information

# Enhanced Reduction of C-N Multiple Bonds using Sodium Borohydride and an Amorphous Nickel Catalyst

Shouxin Liu,<sup>a,b\*</sup> Yihua Yang,<sup>a</sup> Xiaoli Zhen,<sup>a</sup> Junzhang Li,<sup>a</sup> Huimin He,<sup>a</sup> Juan Feng<sup>a</sup> and Andrew Whiting<sup>b\*</sup>

<sup>a</sup>State Key Laboratory Breeding Base-Hebei Province Key Laboratory of Molecular Chemistry for Drug, College of Chemical and Pharmaceutical Engineering, Hebei University of Science & Technology, Shijiazhuang 050018, People's Republic of China.

<sup>b</sup>Centre for Sustainable Chemical Processes, Department of Chemistry, Durham University, Science Laboratories, South Road, Durham DH1 3LE, United Kingdom

| Table of Contents                                          | Page |
|------------------------------------------------------------|------|
| General experimental                                       | 2    |
| Amorphous nickel (Ni <sup>0</sup> ) characterization       | 2    |
| <sup>1</sup> H and <sup>13</sup> C NMR spectra of products | 5    |

## Experimental

### General experimental

$^1\text{H}$  NMR and  $^{13}\text{C}$  NMR were recorded on a Bruker Avance II 500 spectrometer in  $\text{CDCl}_3$  except otherwise stated, using tetramethylsilane as an internal reference, operated at 500.13 for  $^1\text{H}$  and 125.67 MHz for  $^{13}\text{C}$ , and J values were given in Hz. HR-EI-MS data were measured with a Micromass Autospec-Ultima ETOF spectrometer. X-ray powder diffraction (XRD) was performed on a D/MAX-2500 X-ray diffractometer using  $\text{Cu-K}\alpha$  radiation ( $k = 0.154$  nm). The surface area of samples was determined by BET method on an automatic surface area and pore size analyzer (Quantachrome Instruments Quantachrome NOVA Automated Gas Sorption System). The surface morphology and the diffusion of amorphous nickel ( $\text{Ni}^0$ ) were observed by scanning electronic microscopy (SEM) performed on a LEO 1530VP instrument.

### Amorphous nickel ( $\text{Ni}^0$ ) characterization

A typical XRD, SEM morphology and particle size distribution graphic are depicted in Figure 1, 2 and 3, respectively.

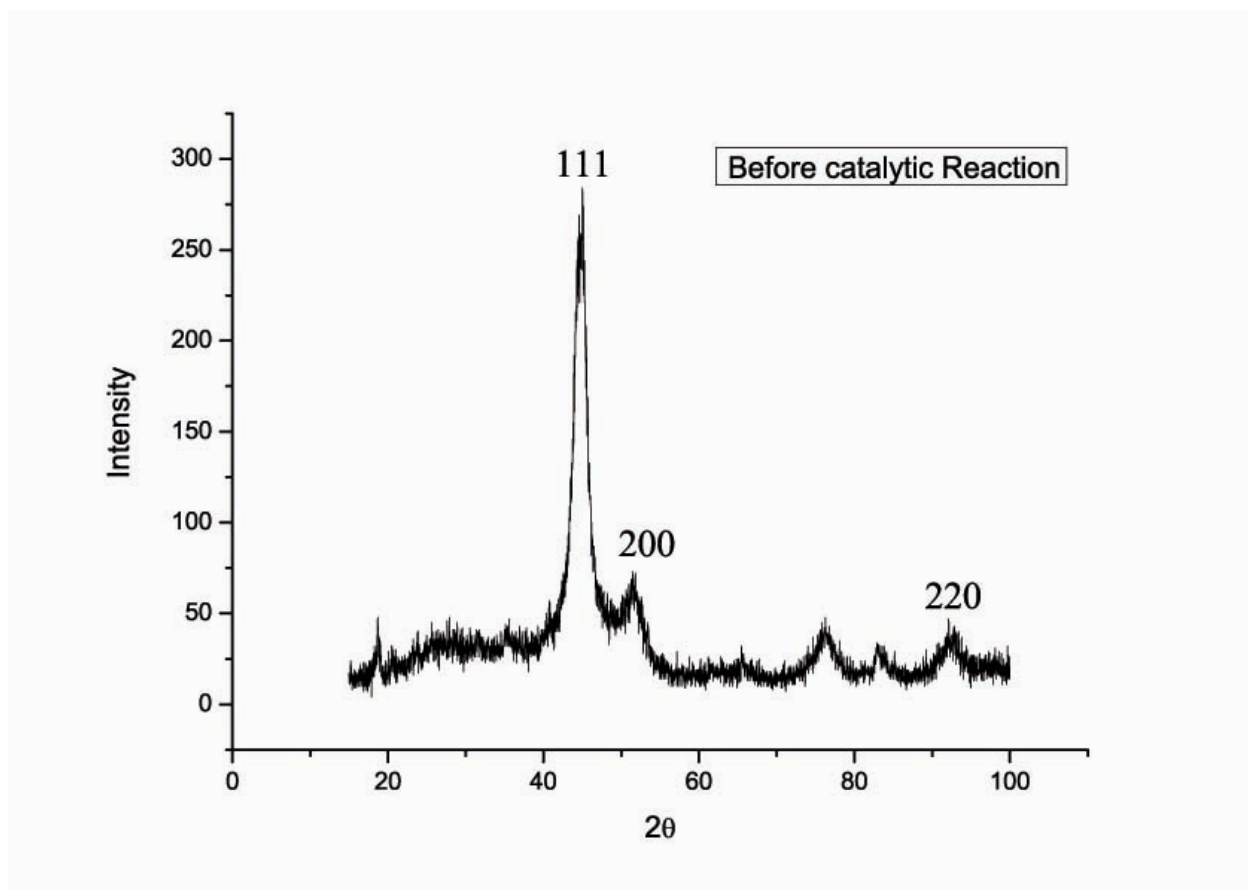

Fig. 1. X-ray diffraction spectrum of amorphous Ni using Cu-K $\alpha$  (0.154 nm) radiation.

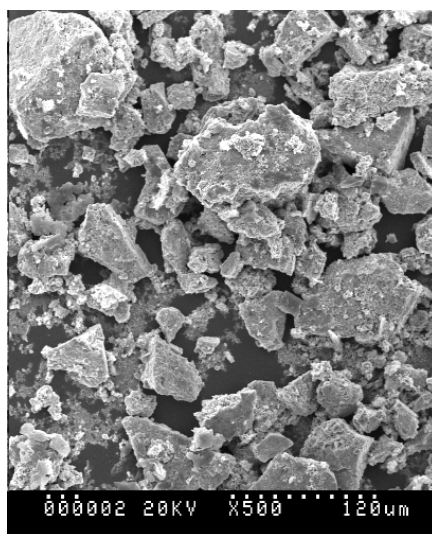

Fig. 2. SEM morphology of amorphous nickel catalyst at room temperature.

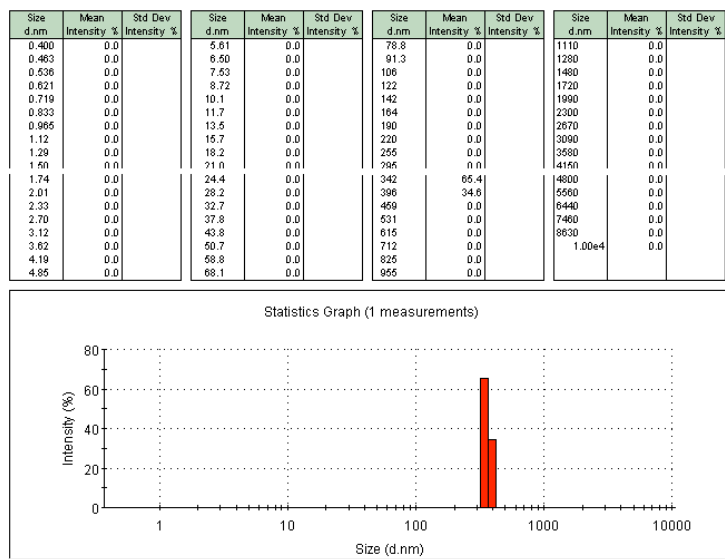

Fig 3 The particle size distribution of amorphous nickel

liushouxin-ZBA

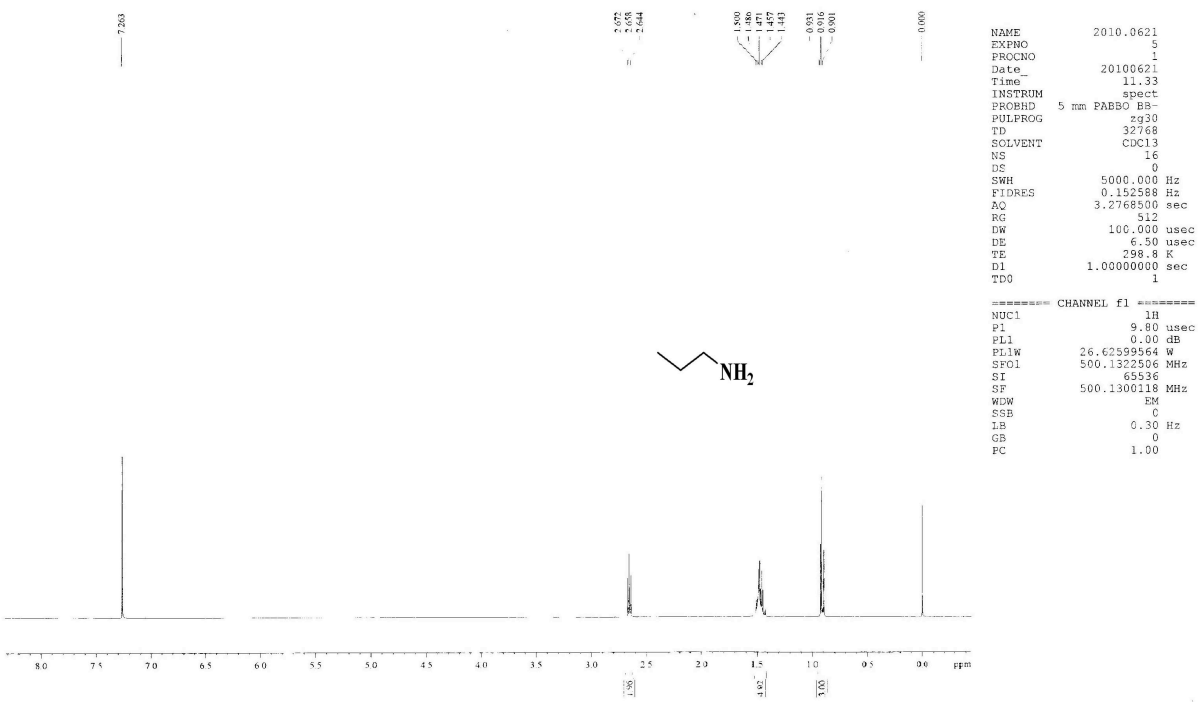

liushouxin-ZBA

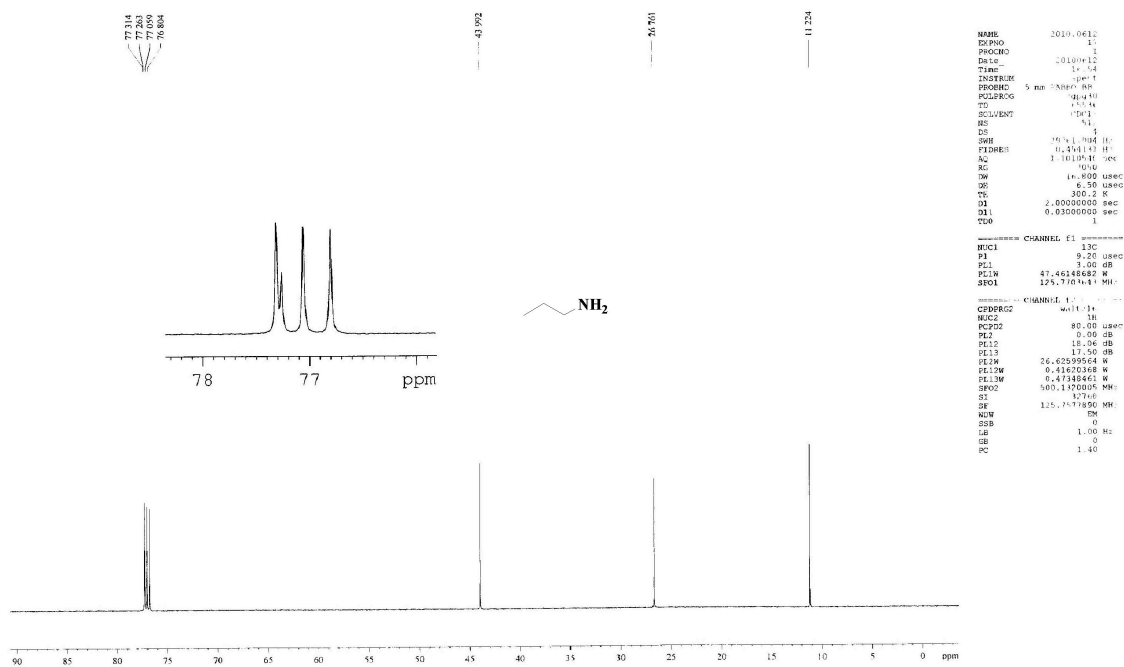





liushouxin-benzene-ethyl-amine

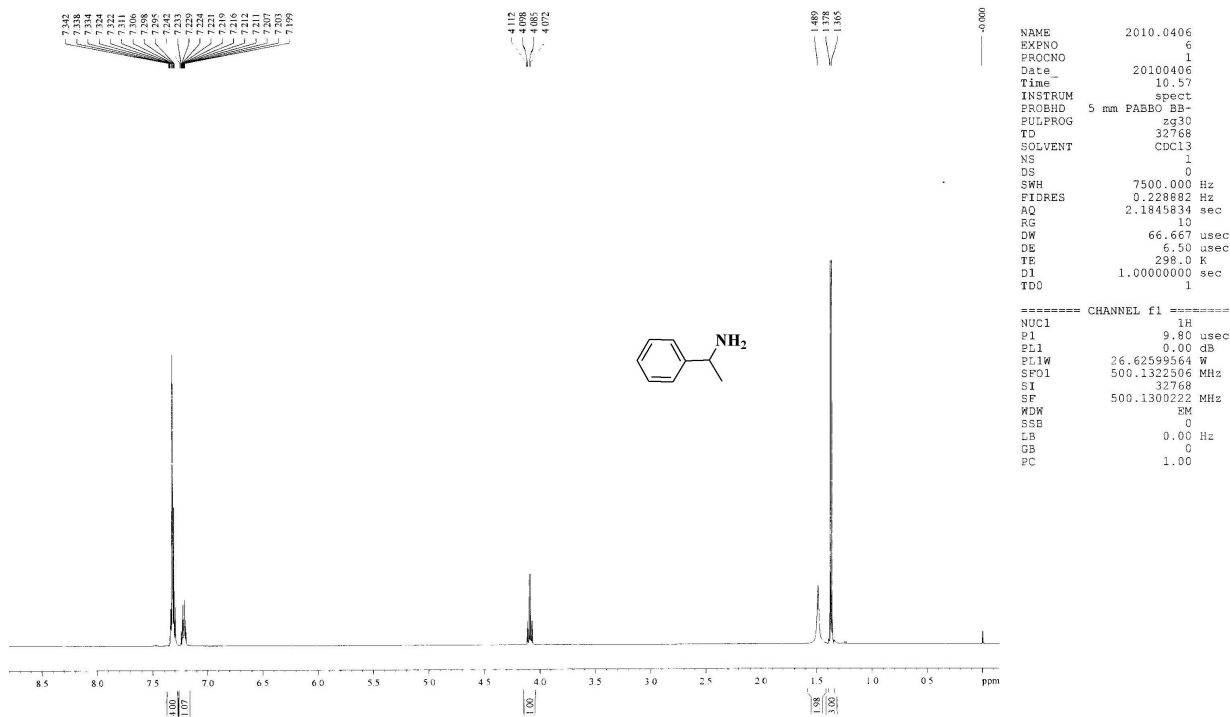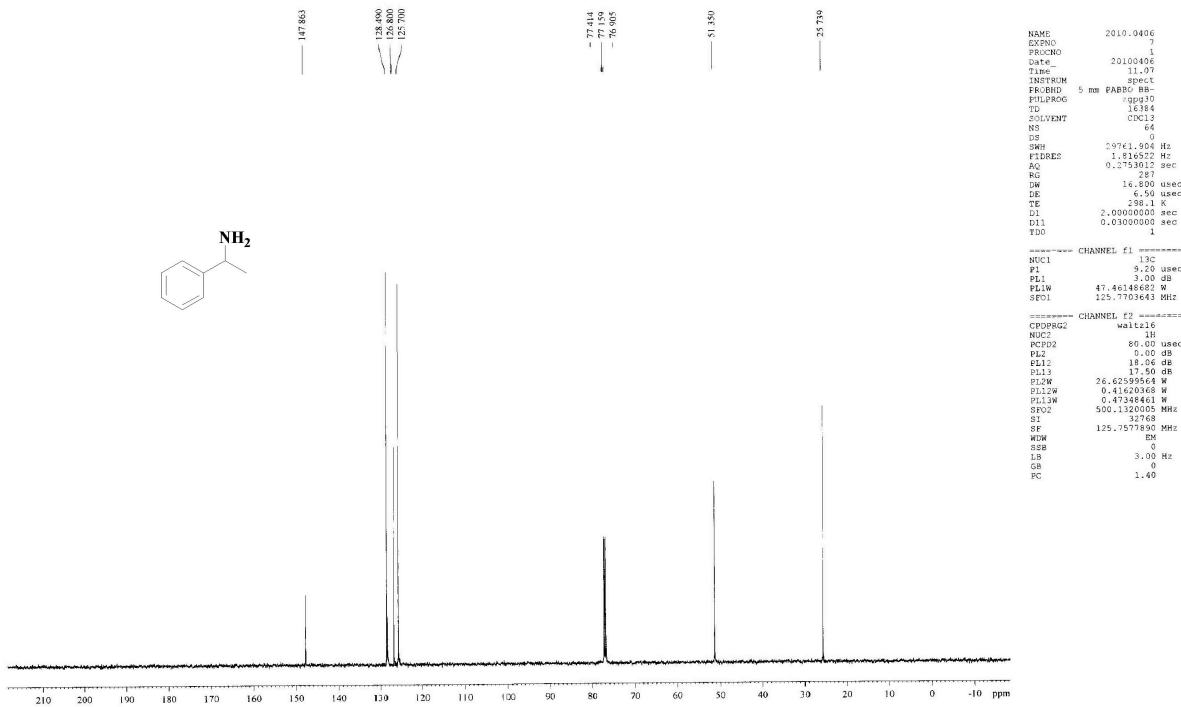



liushouxin-phenylglycine

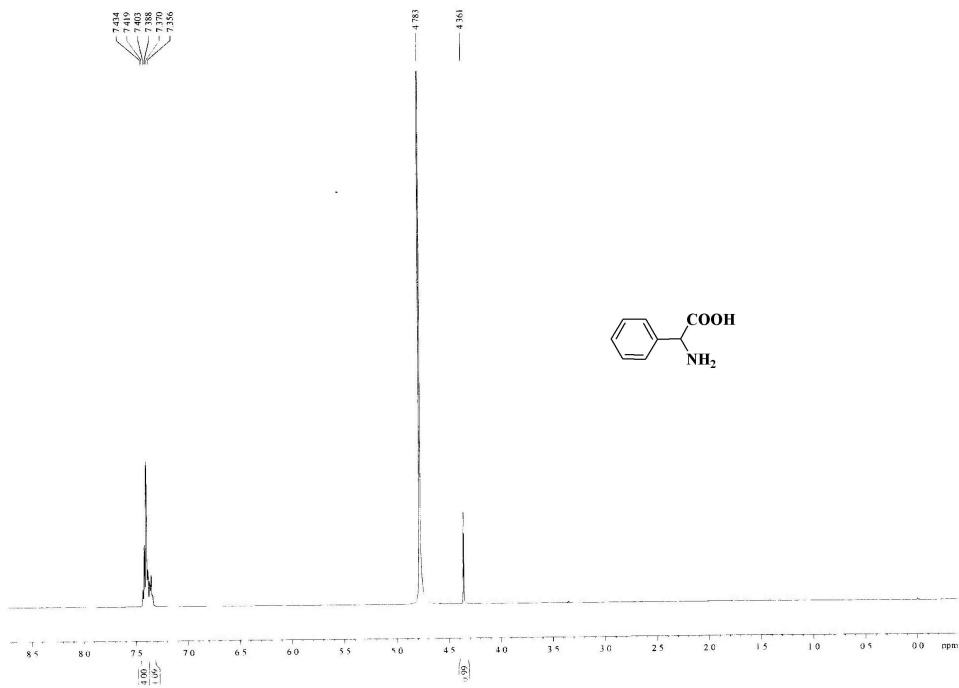

```

NAME      2010.0730
EXPNO     5
PROCNO    1
Date_     20100730
Time      17.12
INSTRUM   spect
PROBHD    5 mm PABBO BB-
PULPROG   zg30
TD         32768
SOLVENT   D2O
NS         8
DS         0
SWH        5000.000 Hz
FIDRES     0.152588 Hz
AQ         3.2768500 sec
RG         322
DW         100.000 usec
DE         6.50 usec
TE         295.1 K
D1         1.00000000 sec
D11
TDO        1
    
```

```

===== CHANNEL f1 =====
NUC1      1H
P1         9.80 usec
PL1        0.00 dB
PL1W       26.62599564 W
SFO1       500.1322506 MHz
SI         65536
SF         500.1299631 MHz
WDW        EM
SSB        0
LB         0.30 Hz
GB         0
PC         1.00
    
```

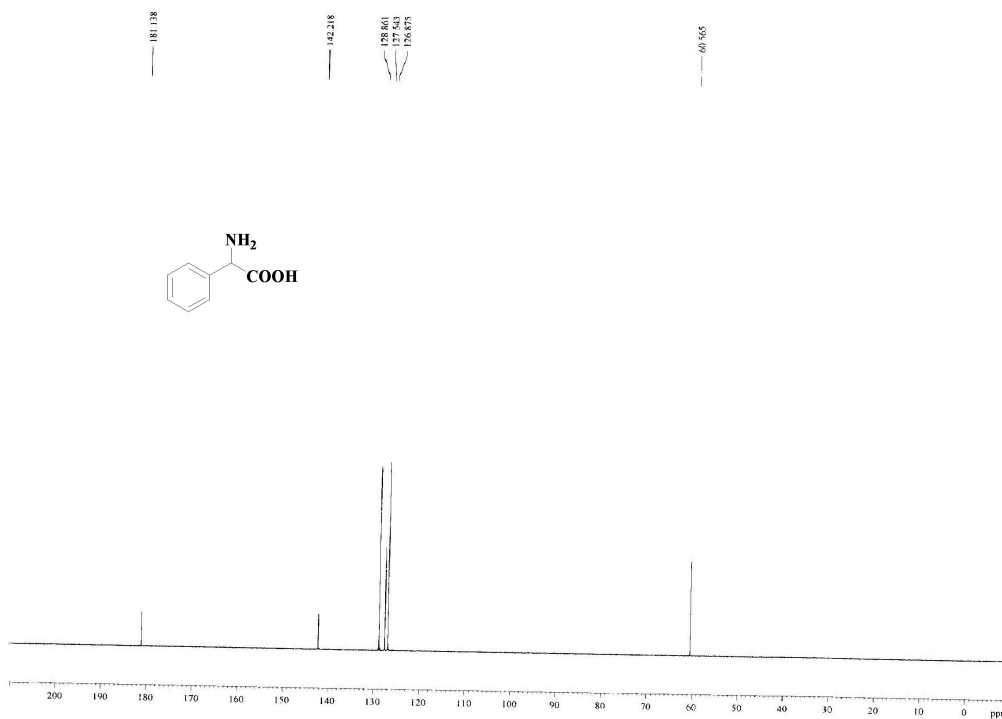

```

NAME      2010.0811
EXPNO     5
PROCNO    1
Date_     20100811
Time      9.16
INSTRUM   spect
PROBHD    5 mm PABBO BB-
PULPROG   zg30
TD         32768
SOLVENT   D2O
NS         2683
DS         0
SWH        31250.000 Hz
FIDRES     0.953474 Hz
AQ         0.5243180 sec
RG         2050
DW         16.000 usec
DE         6.50 usec
TE         300.2 K
D1         2.00000000 sec
D11
D111
TDO        1
    
```

```

===== CHANNEL f1 =====
NUC1      13C
P1         9.20 usec
PL1        2.00 dB
PL1W       47.46148682 W
SFO1       125.7716724 MHz
    
```

```

===== CHANNEL f2 =====
CPDPRG    waltz16
NUC2      1H
NUC3      13C
P2         80.00 usec
P3         0.00 dB
PL2        18.06 dB
PL3        17.50 dB
PL1W       76.62599564 W
PL2W       0.42107668 W
PL3W       0.47348461 W
SFO2       500.1322506 MHz
SI         32768
SF         125.7577890 MHz
WDW        EM
SSB        0
LB         1.00 Hz
GB         0
PC         1.40
    
```

liushouxin-X-1

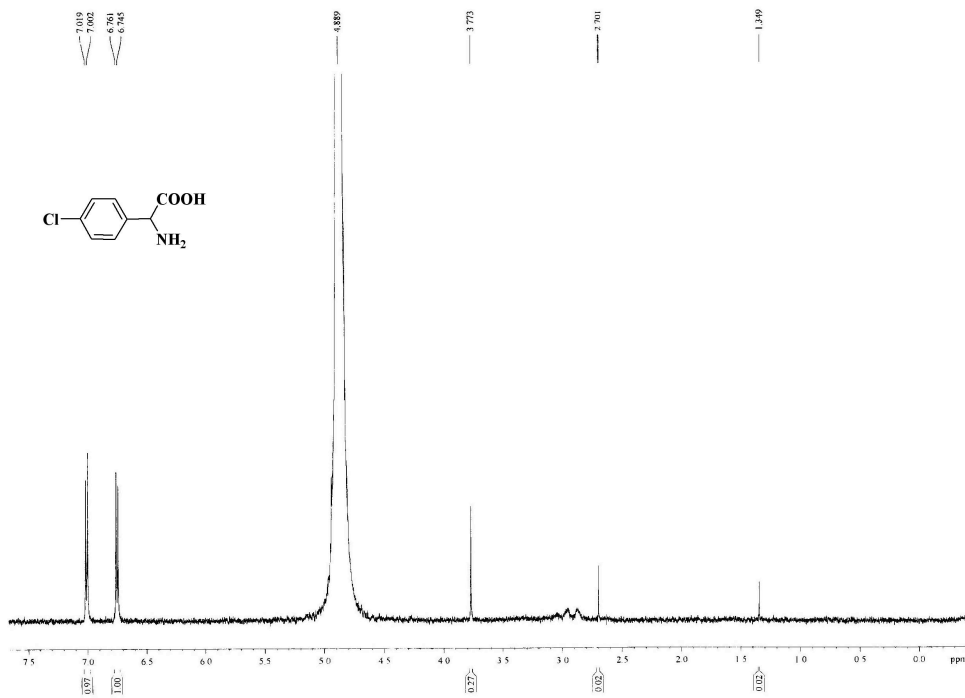

```

NAME      2009.1228
EXPNO     10
PROCNO    1
Date_     20091230
Time      8.22
INSTRUM   spect
PROBHD    5 mm PABBO BB-
PULPROG   zg30
TD         32768
SOLVENT   D2O
NS         8
DS         0
SWH       7500.000 Hz
FIDRES    0.228882 Hz
AQ         2.1845834 sec
RG         256
DW         66.667 usec
DE         6.50 usec
TE         298.0 K
D1         2.00000000 sec
TDO        1

===== CHANNEL f1 =====
NUC1       1H
P1         9.60 usec
PL1        0.00 dB
PL1W       26.62599564 W
SFO1       500.1335009 MHz
SI         32768
SF         500.1300000 MHz
WDW        EM
SSB        0
LB         0.30 Hz
GB         0
PC         1.00
    
```

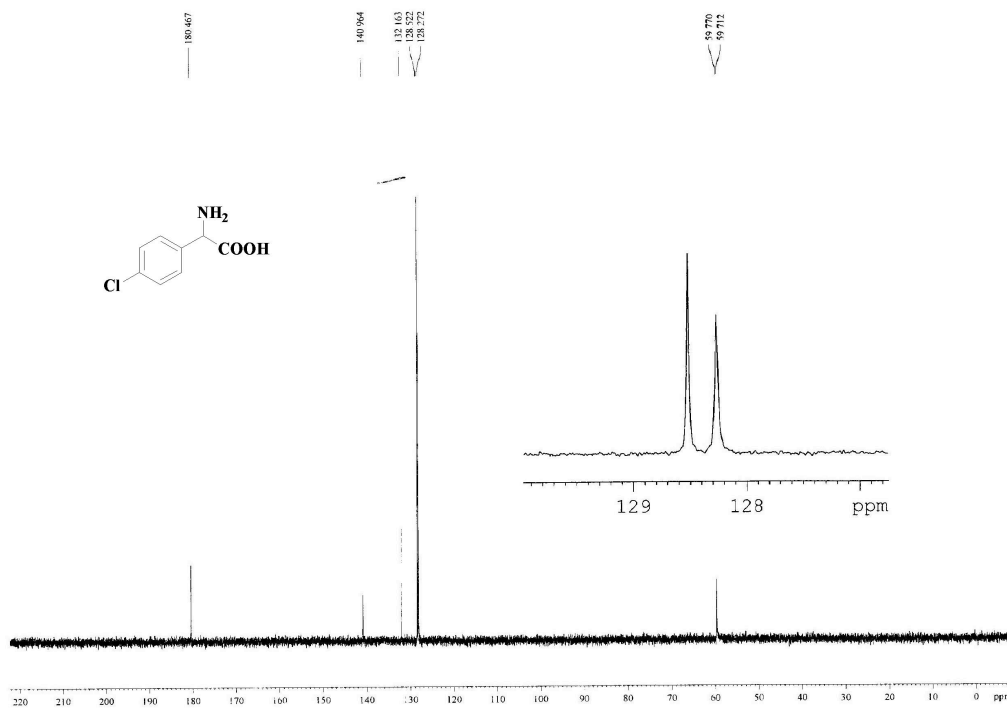

```

NAME      2009.1228
EXPNO     9
PROCNO    1
Date_     20091228
Time      22.66
INSTRUM   spect
PROBHD    5 mm PABBO BB-
PULPROG   zgpg30
TD         65536
SOLVENT   D2O
NS         4
DS         8
SWH       31250.000 Hz
FIDRES    0.4746837 Hz
AQ         1.0486259 sec
RG         161
DW         16.000 usec
DE         6.50 usec
TE         298.0 K
D1         2.00000000 sec
D11        0.03000000 sec
TDO        1

===== CHANNEL f1 =====
NUC1       13C
P1         9.15 usec
PL1        3.00 dB
PL1W       47.46148682 W
SFO1       125.7576950 MHz

===== CHANNEL f2 =====
CPDPRG2   waltz16
NUC2       1H
PCPD2     80.00 usec
PL2        0.00 dB
PL2W      18.42 dB
PL3        17.50 dB
PL3W      26.62599564 W
SFO2       0.38309446 W
SFO3       0.47348461 W
SF02      500.1300000 MHz
SI         32768
SF         125.7576950 MHz
WDW        EM
SSB        0
LB         1.00 Hz
GB         0
PC         1.40
    
```

liushouxin-df-acid

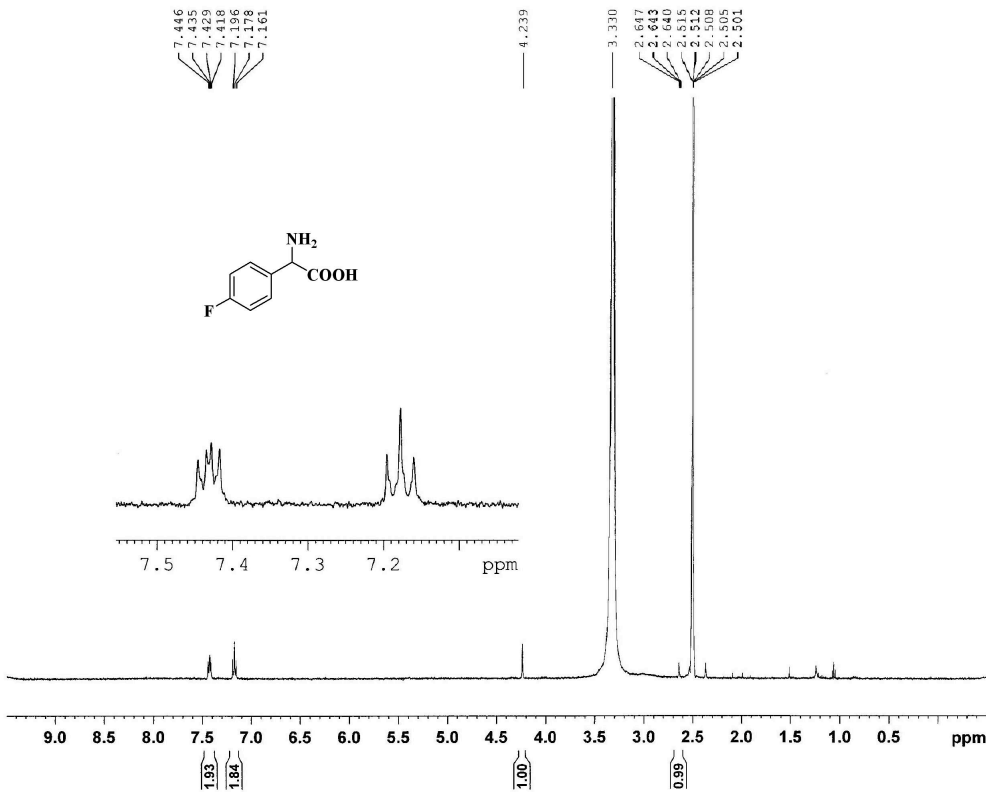

Current Data Parameters  
 NAME 2008.0523  
 EXPNO 14  
 PROCNO 1  
 F2 - Acquisition Parameters  
 Date\_ 20080523  
 Time 16.15  
 INSTRUM spect  
 PROBHD 5 mm PABUL 13C  
 PULPROG zg30  
 TD 65536  
 SOLVENT DMSO  
 NS 8  
 DS 2  
 SWH 5000.000 Hz  
 FIDRES 0.076294 Hz  
 AQ 6.5536499 sec  
 RG 322  
 DW 100.000 usec  
 DE 8.00 usec  
 TE 300.2 K  
 D1 1.00000000 sec  
 TDO 1  
 CHANNEL f1  
 NUC1 1H  
 P1 12.60 usec  
 PL1 3.00 dB  
 SFO1 500.1322506 MHz  
 F2 - Processing parameters  
 SI 32768  
 SF 500.1300000 MHz  
 WDW EM  
 SSB 0  
 LB 0.30 Hz  
 GB 0  
 PC 1.00

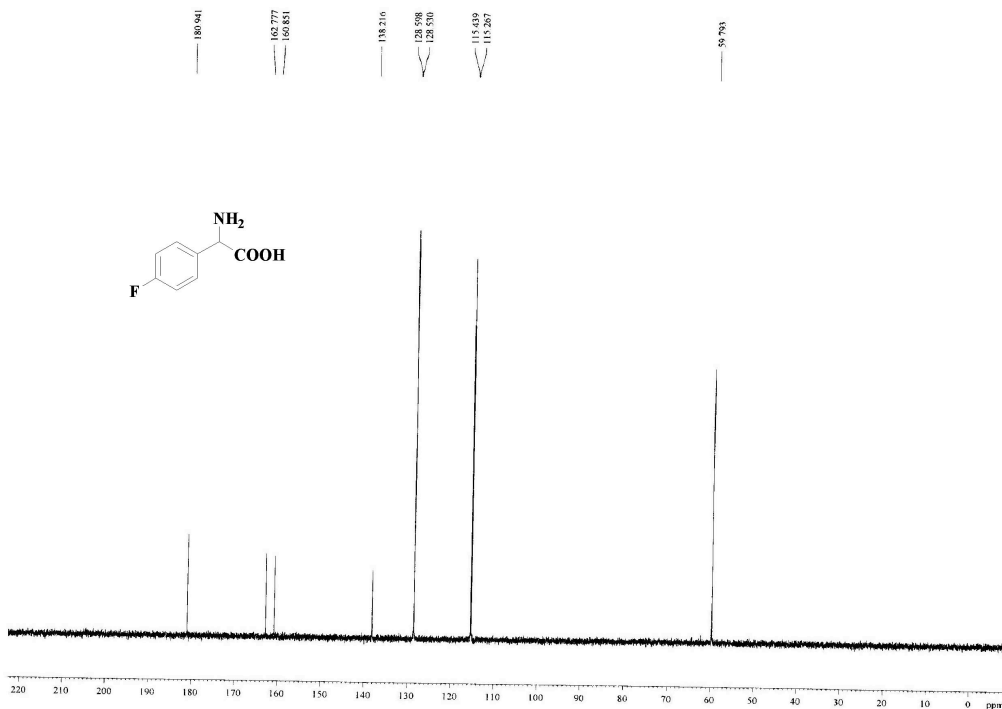

NAME 2009.1228  
 EXPNO 6  
 PROCNO 1  
 Date 20091228  
 Time 20.12  
 INSTRUM spect  
 PROBHD 5 mm PABBO BB-  
 PULPROG zgpg30  
 TD 65536  
 SOLVENT D2O  
 NS 1024  
 DS 2  
 SWH 31250.000 Hz  
 FIDRES 0.476837 Hz  
 AQ 1.0486259 sec  
 RG 131  
 DW 16.000 usec  
 DE 6.50 usec  
 TE 298.0 K  
 D1 2.00000000 sec  
 D11 0.03000000 sec  
 TDO 1  
 CHANNEL f1  
 NUC1 13C  
 P1 9.15 usec  
 PL1 3.00 dB  
 PL1W 47.46149482 W  
 SFO1 125.7716224 MHz  
 CHANNEL f2  
 NUC2 w1t216  
 P2 80.00 usec  
 PL2 0.00 dB  
 PL2W 18.42 dB  
 PL3 17.50 dB  
 PL3W 26.62599564 W  
 PL4W 3.76359446 W  
 PL5W 0.47348461 W  
 SFO2 509.1320005 MHz  
 SFO3 27.68  
 SF 125.7577890 MHz  
 WDW EM  
 SSB 0  
 LB 1.00 Hz  
 GB 0  
 PC 1.40



liushouxin-P-F-phe

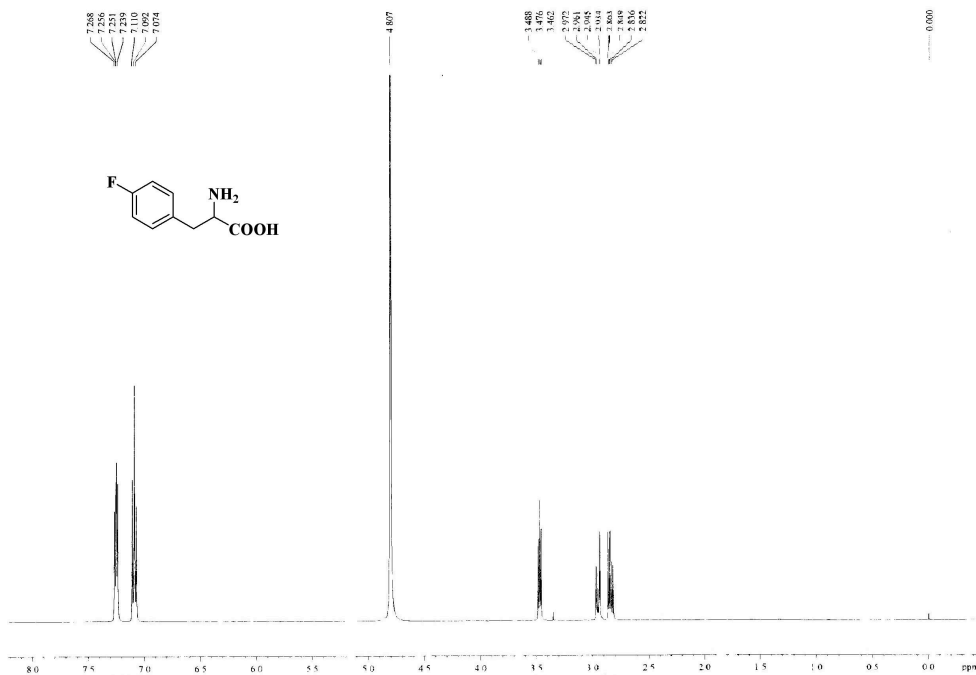

```

NAME      2010.0710
EXPNO     7
PROCNO    1
Date_     20100710
Time      16.25
INSTRUM   spect
PROBHD    5 mm PABBO BB-
PULPROG   zg30
TD        32768
SOLVENT   D2O
NS         8
DS         0
SWH        5000.000 Hz
FIDRES    0.152588 Hz
AQ         3.2768500 sec
RG         287
DW         100.000 usec
DE         6.50 usec
TE         299.7 K
D1         1.00000000 sec
TD0        1
    
```

```

===== CHANNEL f1 =====
NUC1      1H
P1         9.80 usec
PL1        0.00 dB
PL1W      26.62599564 W
SFO1      500.1322506 MHz
SI         65536
SF         500.1299564 MHz
WDW        EM
SSB        0
LB         0.30 Hz
GB         0
PC         1.00
    
```

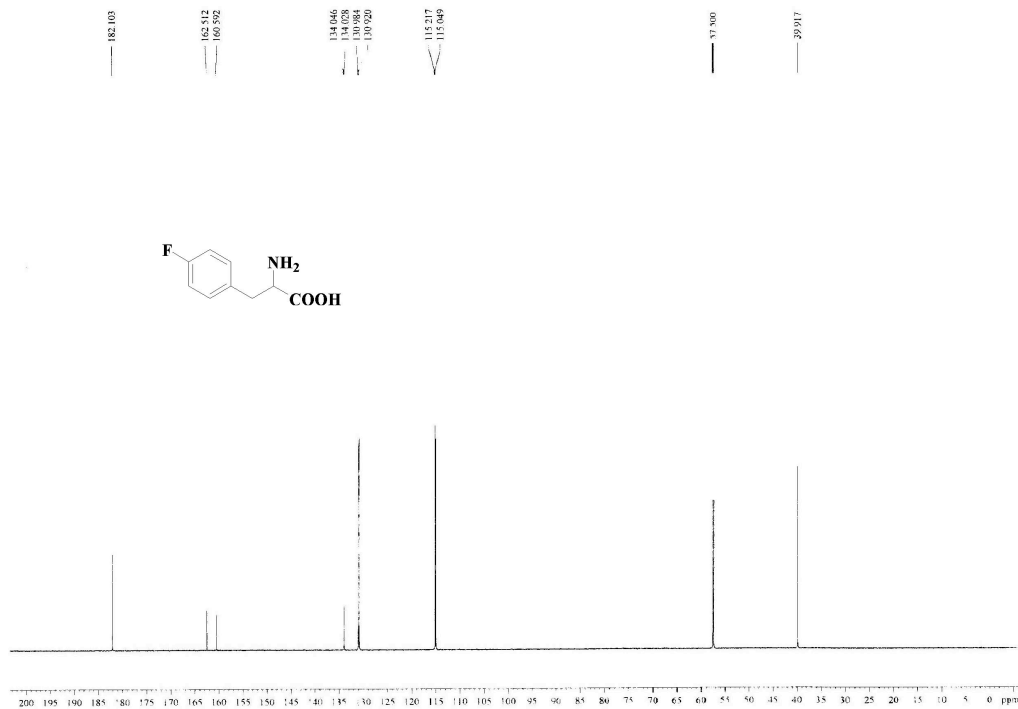

```

NAME      2010.0712
EXPNO     1
PROCNO    1
Date_     20100713
Time      10.05
INSTRUM   spect
PROBHD    5 mm PABBO BB-
PULPROG   zgpg30
TD        65536
SOLVENT   D2O
NS         8
DS         0
SWH        37894.738 Hz
FIDRES    0.301394 Hz
AQ         0.9961972 sec
RG         2050
DW         15.700 usec
DE         6.50 usec
TE         301.3 K
D1         2.05000000 sec
D11       0.03000000 sec
TD0        1
    
```

```

===== CHANNEL f1 =====
NUC1      13C
P1         9.20 usec
PL1        3.00 dB
PL1W      47.46148682 W
SFO1      125.7739087 MHz

===== CHANNEL f2 =====
CDEPRG2   waltz16
NUC2      1H
PCPD2     80.00 usec
P12        0.60 dB
P12W      18.96 W
P13        17.30 dB
P13W      26.42599564 W
SFO2      0.41200365 MHz
P12W      0.473484e1 W
SFO3      500.1320005 MHz
SI         32768
SF         125.7877193 MHz
WDW        EM
SSB        0
LB         1.00 Hz
GB         0
PC         1.40
    
```

liushouxin-P-Cl-phe

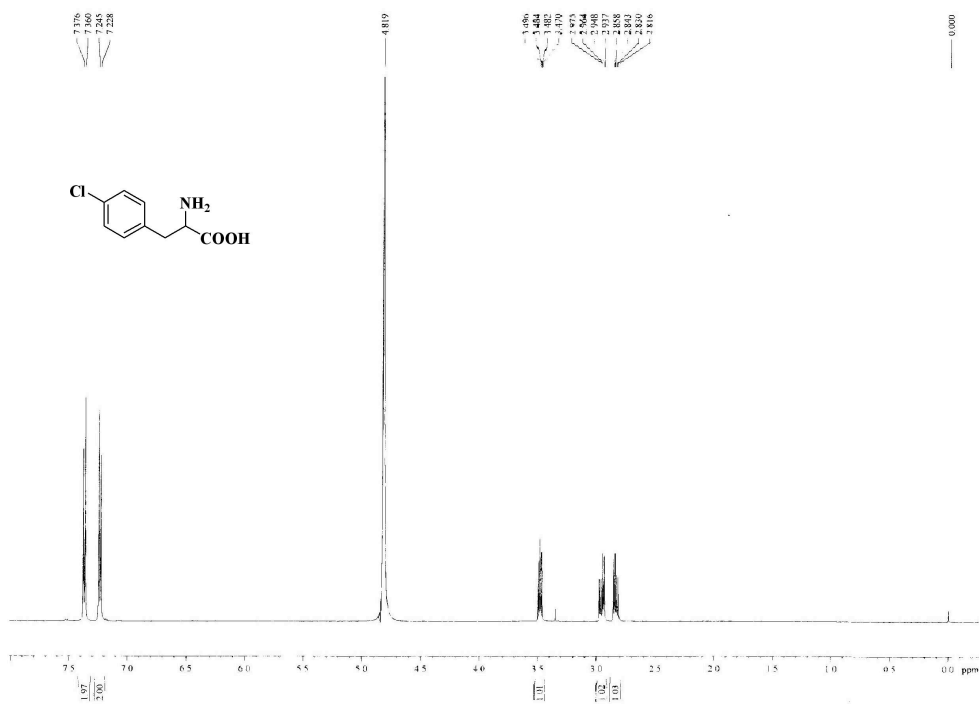

```

NAME      2010.0710
EXPNO     9
PROCNO    1
Date_     20100710
Time      16.42
INSTRUM   spect
PROBHD    5 mm PABBO BB-
PULPROG   zg30
TD         32768
SOLVENT   D2O
NS         8
DS         0
SWH        5000.000 Hz
FIDRES     0.152588 Hz
AQ         3.2768500 sec
RG         322
DW         100.000 usec
DE         6.50 usec
TE         299.7 K
D1         1.00000000 sec
TDO        1
    
```

```

===== CHANNEL f1 =====
NUC1      1H
P1        9.80 usec
PL1       0.00 dB
PLLW      26.62599564 W
SFO1      500.1322506 MHz
SI        65536
SF        500.1299522 MHz
WDW       EM
SSB       0
LB        0.30 Hz
GB        0
PC        1.00
    
```

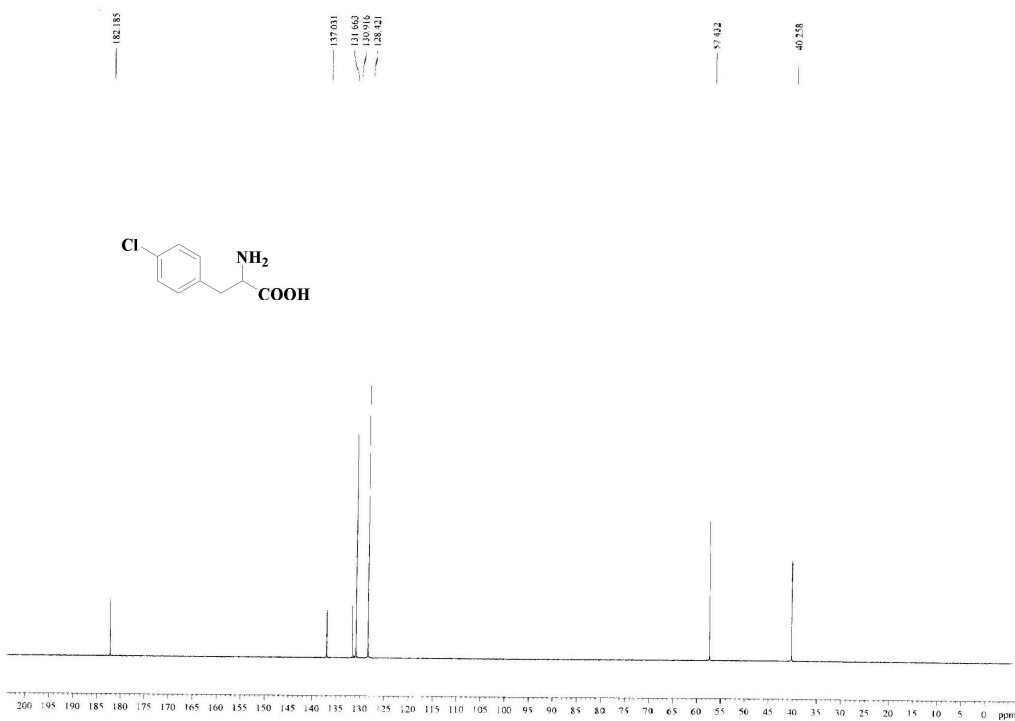

```

NAME      2010.0710
EXPNO     8
PROCNO    1
Date_     20100710
Time      21.31
INSTRUM   spect
PROBHD    5 mm PABBO BB-
PULPROG   zgpg30
TD         65536
SOLVENT   D2O
NS         4
DS         1
SWH        32894.738 Hz
FIDRES     0.5201934 Hz
AQ         0.9961972 sec
RG         700
DW         15.200 usec
DE         6.50 usec
TE         301.4 K
D1         2.00000000 sec
D11        0.93000000 sec
TDO        1
    
```

```

===== CHANNEL f1 =====
NUC1      13C
P1        9.20 usec
PL1       3.00 dB
PLLW      47.46146662 W
SFO1      125.7735087 MHz
    
```

```

===== CHANNEL f2 =====
CPDPRG2   waltz16
NUC2      1H
PCPD2     80.00 usec
PL2       0.00 dB
PL12      18.00 dB
PL13      17.50 dB
ELW       76.62599564 W
EL12W     0.41620368 W
EL13W     0.47588441 W
SFO2      500.1322506 MHz
SI        32768
SF        225.7577598 MHz
WDW       EM
SSB       0
LB        1.20 Hz
GB        0
PC        1.00
    
```

liushouxin-P-Br-phe

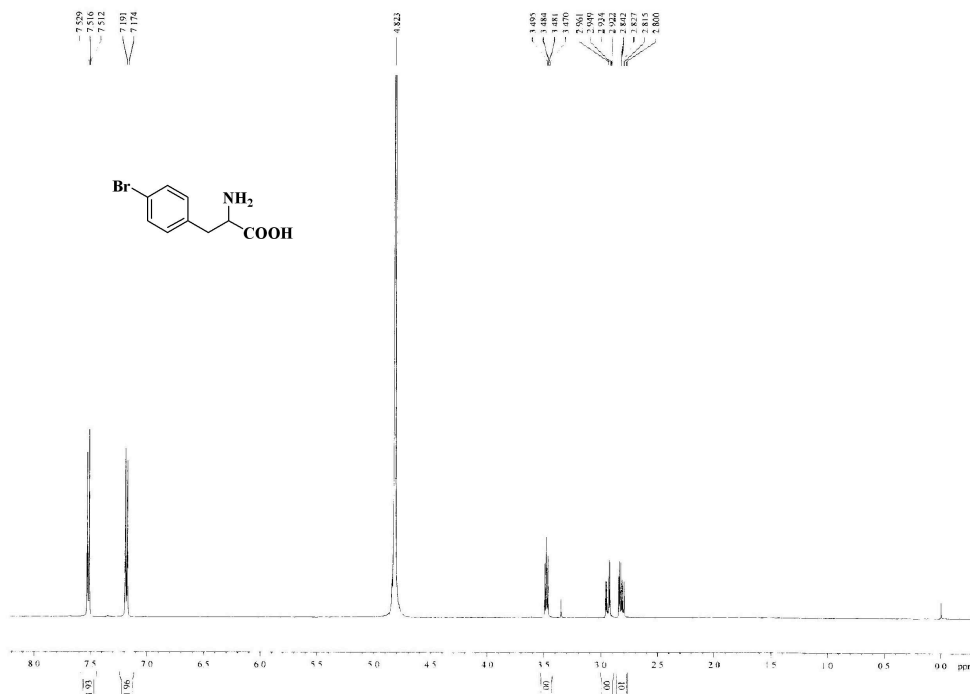

```

NAME      2010.0710
EXPNO    10
PROCNO   1
Date_    20100710
Time     16.49
INSTRUM  spect
PROCBD   5 mm PABBO BB-
PULPROG  zg30
TD       32768
SOLVENT  D2O
NS       16
DS       0
SWH      5000.000 Hz
FIDRES   0.152588 Hz
AQ       3.2768500 sec
RG       362
DW       100.000 usec
DE       6.50 usec
TE       299.6 K
D1       1.0000000 sec
TD0      1
    
```

```

===== CHANNEL f1 =====
NUC1      1H
P1        9.80 usec
PL1       0.00 dB
PL1W      26.62599564 W
SFO1      500.1322506 MHz
SI        65536
SF        500.1299506 MHz
WDW       EM
SSB       0
LB        0.30 Hz
GB        0
PC        1.00
    
```

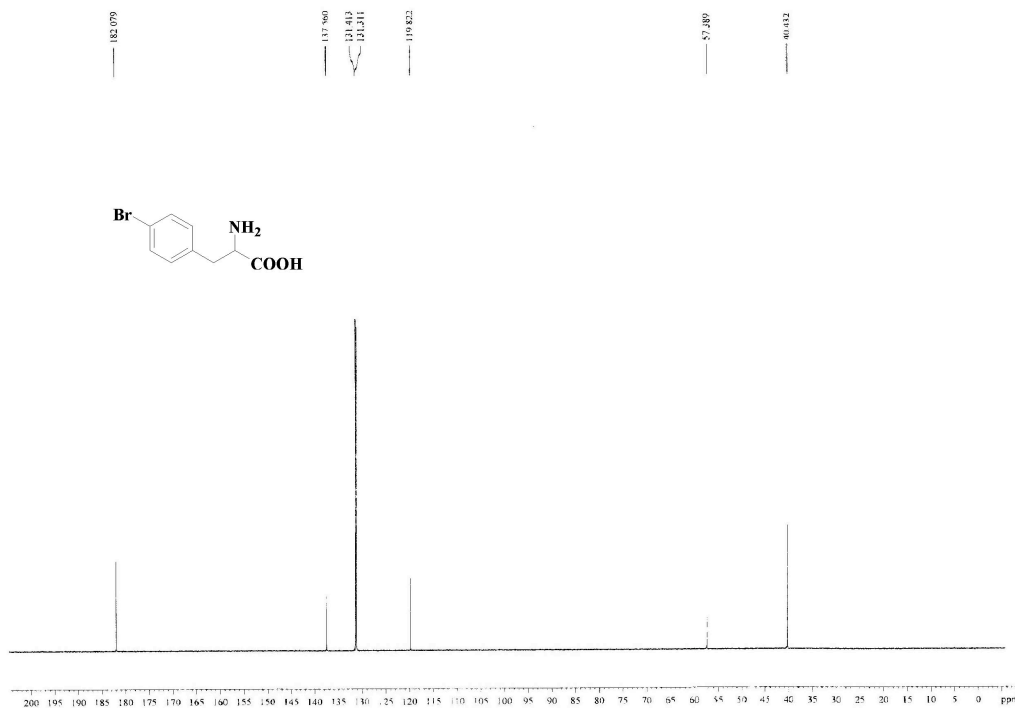

```

NAME      2010.0712
EXPNO    5
PROCNO   1
Date_    20100712
Time     8.28
INSTRUM  spect
PROCBD   5 mm PABBO BB-
PULPROG  zgpg30
TD       65536
SOLVENT  D2O
NS       160
DS       0
SWH      12504.718 Hz
FIDRES   0.501934 Hz
AQ       0.5961572 sec
RG       7350
DW       15.700 usec
DE       6.50 usec
TE       300.3 K
D1       1.0000000 sec
D11      0.0300000 sec
TD0      1
    
```

```

===== CHANNEL f1 =====
NUC1      13C
P1        5.20 usec
PL1       0.00 dB
PL1W      47.46148682 W
SFO1      125.7135087 MHz
    
```

```

===== CHANNEL f2 =====
OPPROG2  waltz16
NUC2      1H
PCPD2    80.00 usec
PL2       0.00 dB
PL12     15.00 dB
PL13     15.00 dB
PL1W     26.62599564 W
DEL1W    0.41679568 W
DEL1W    0.41679568 W
SFO2     500.1320005 MHz
SI        32768
SF       125.7577859 MHz
WDW       EM
SSB       0
LB        1.00 Hz
GB        0
PC        1.40
    
```

liushouxin-P-MeO-phe

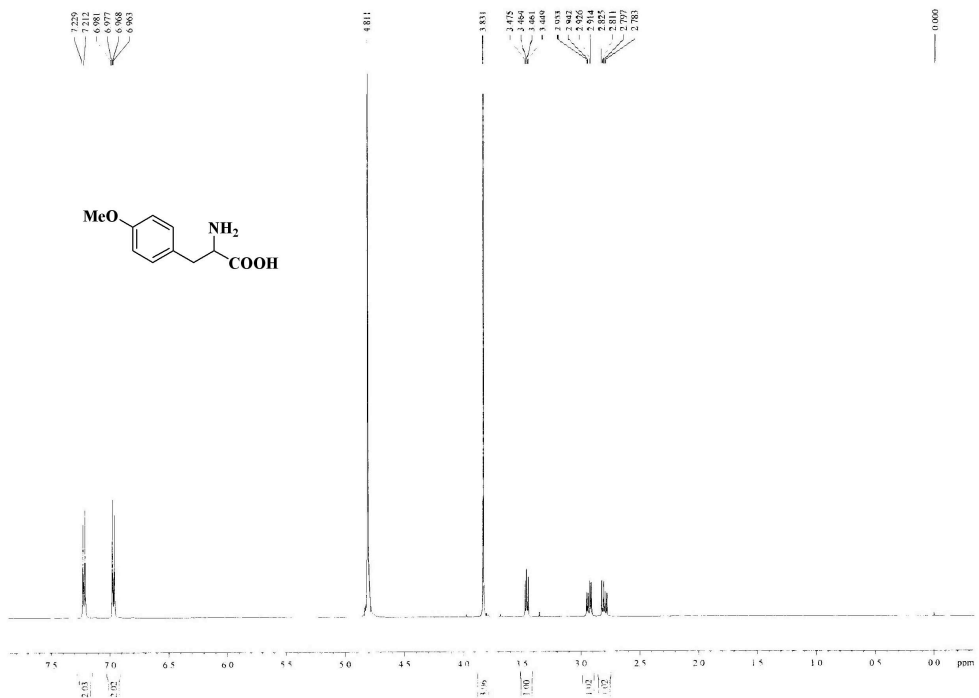

```

NAME      2010.0710
EXPNO    11
PROCNO   1
Date_    20100710
Time     16.55
INSTRUM  spect
PROBHD   5 mm PABBO BB-
PULPROG  zg30
TD       32768
SOLVENT  D2O
NS       8
DS       0
SWH      5000.000 Hz
FIDRES   0.152568 Hz
AQ       3.2768500 sec
RG       256
DW       100.000 usec
DE       6.50 usec
TE       289.5 K
D1       1.00000000 sec
TDO      1
    
```

```

===== CHANNEL f1 =====
NUC1     1H
P1       9.80 usec
PL1      0.00 dB
PL1W     26.62599564 W
SFO1     500.1322506 MHz
SI       65536
SF       500.12899549 MHz
WDW      EM
SSB      0
LB       0.30 Hz
GB       0
PC       1.00
    
```

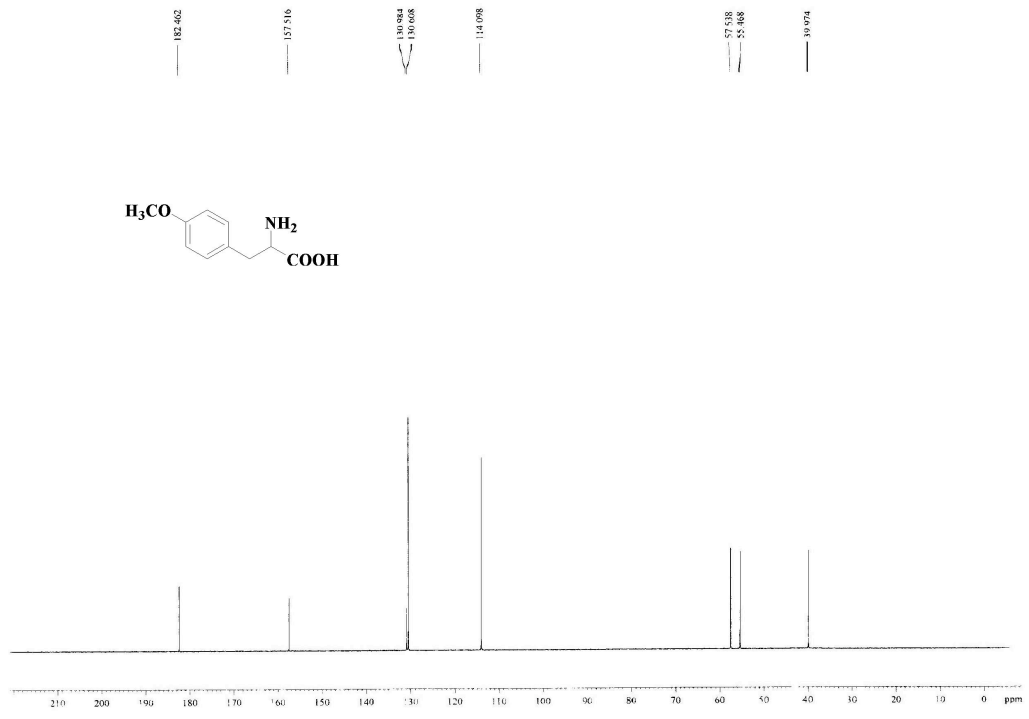

```

NAME      2010.0712
EXPNO    7
PROCNO   1
Date_    20100719
Time     20.49
INSTRUM  spect
PROBHD   5 mm PABBO BB-
PULPROG  zgpg30
TD       65536
SOLVENT  D2O
NS       4
DS       4
SWH      72894.738 Hz
FIDRES   0.501934 Hz
AQ       0.598177 sec
RG       2050
DW       15.200 usec
DE       6.50 usec
TE       301.4 K
D1       2.00000000 sec
D11      0.03000000 sec
TDO      1
    
```

```

===== CHANNEL f1 =====
NUC1     13C
P1       9.20 usec
PL1      3.00 dB
PL1W     47.46148682 W
SFO1     125.7735687 MHz
    
```

```

===== CHANNEL f2 =====
CPDPRG2  waltz16
NUC2     1H
PCPD2    60.00 usec
PL2      0.00 dB
PL2W     18.00 dB
SFO2     500.1322506 MHz
SFO1W    26.62599564 W
SFO2W    0.41707068 W
SFO1W    0.47344461 W
SFO2W    600.1320005 MHz
SI       32768
SF       125.7677890 MHz
WDW      EM
SSB      0
LB       1.00 Hz
GB       0
PC       1.40
    
```



liushouxin-P-pyr

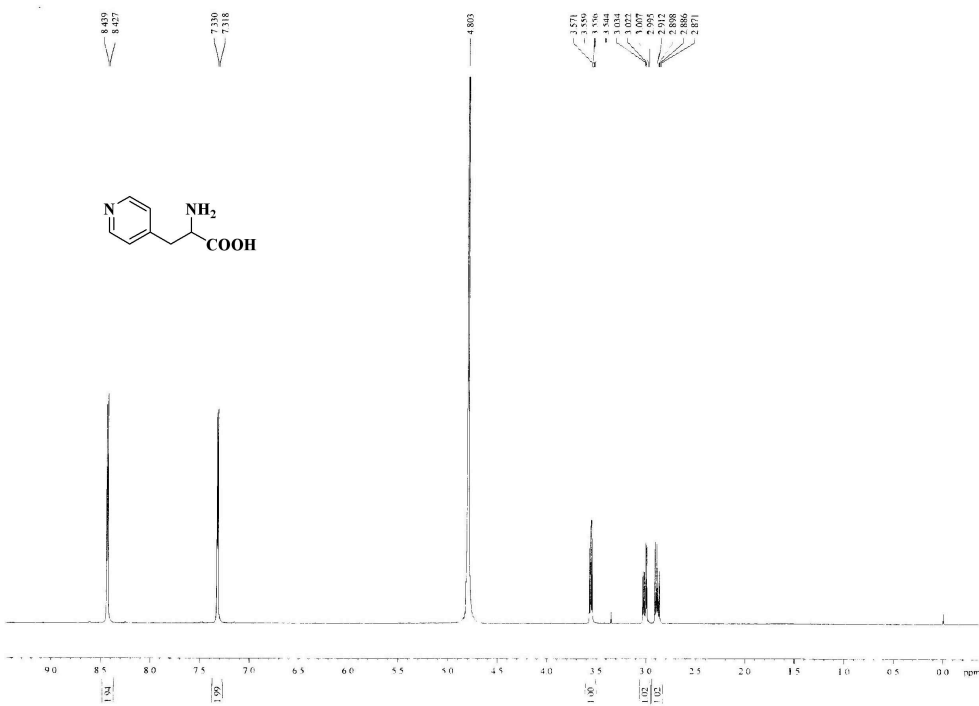

```

NAME      2010.0710
EXPNO     8
PROCNO    1
Date_     20100710
Time      16.33
INSTRUM   spect
PROBHD    5 mm PABBO BB-
PULPROG   zg30
TD         32768
SOLVENT   D2O
NS         8
DS         0
SWH       5000.000 Hz
FIDRES    0.152588 Hz
AQ         3.276800 sec
RG         322
DW         100.000 usec
DE         6.50 usec
TE         299.6 K
D1         1.00000000 sec
TD0        1
    
```

```

===== CHANNEL f1 =====
NUC1      1H
P1        9.80 usec
PL1       0.00 dB
PL1W      26.62599564 W
SFO1      500.1322506 MHz
SI        65536
SF        500.1299571 MHz
WDW       EM
SSB       0
LB        0.30 Hz
GB         0
PC         1.00
    
```

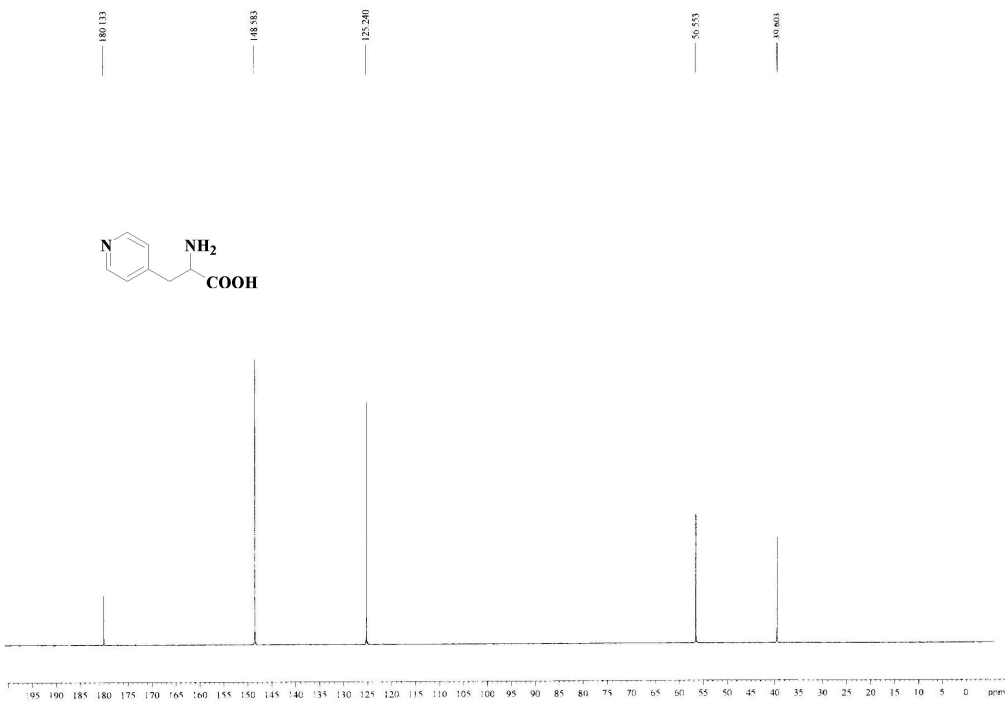

```

NAME      2010.0712
EXPNO     10
PROCNO    1
Date_     20100713
Time      9.10
INSTRUM   spect
PROBHD    5 mm PABBO BB-
PULPROG   zgpg30
TD         65536
SOLVENT   D2O
NS         701
DS         4
SWH       32894.188 Hz
FIDRES    0.501934 Hz
AQ         0.9961972 sec
RG         2050
DW         15.500 usec
DE         6.50 usec
TE         301.1 K
D1         2.00000000 sec
D11        0.03000000 sec
TD0        1
    
```

```

===== CHANNEL f1 =====
NUC1      13C
P1        9.20 usec
PL1       3.00 dB
PL1W      47.46148482 W
SFO1      125.7735087 MHz

===== CHANNEL f2 =====
<CDPRG2   waltz16
NUC2      1H
PCPD2     80.00 usec
PL2       0.00 dB
PL2W      18.06 dB
PL13      37.50 dB
PL2W      24.62599564 W
PL13W     0.41203408 W
PL13W     0.47348401 W
SFO2      500.1320005 MHz
SI        37768
SF        125.7577890 MHz
WDW       EM
SSB       0
LB        1.00 Hz
GB         0
PC         1.40
    
```

liushouxin--N-B

萘丙氨酸

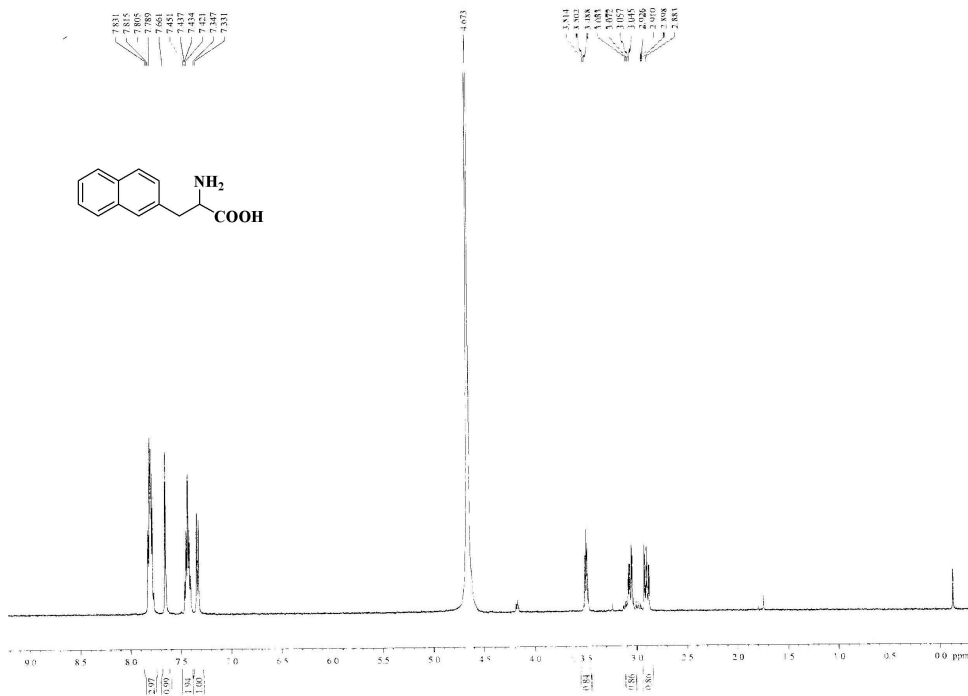

```

NAME          2011.0330
EXPNO         8
PROCNO        1
Date_         20110310
Time         14.59
INSTRUM       spect
PROBHD        5 mm PABBO BB-
PULPROG       zg30
TD            32768
SOLVENT       D2O
NS            8
DS            0
SWH           5000.000 Hz
FIDRES       0.152368 Hz
AQ           3.2768500 sec
RG            90.5
DW           100.000 usec
DE            6.50 usec
TE            298.0 K
D1            1.00000000 sec
TD0           1
    
```

```

===== CHANNEL f1 =====
NUC1          1H
P1            1H
PL1           9.80 usec
PL12          0.00 dB
PL13          0.00 dB
PL14          0.00 dB
PL15          0.00 dB
PL16          0.00 dB
PL17          0.00 dB
PL18          0.00 dB
PL19          0.00 dB
PL20          0.00 dB
PL21          0.00 dB
PL22          0.00 dB
PL23          0.00 dB
PL24          0.00 dB
PL25          0.00 dB
PL26          0.00 dB
PL27          0.00 dB
PL28          0.00 dB
PL29          0.00 dB
PL30          0.00 dB
PL31          0.00 dB
PL32          0.00 dB
PL33          0.00 dB
PL34          0.00 dB
PL35          0.00 dB
PL36          0.00 dB
PL37          0.00 dB
PL38          0.00 dB
PL39          0.00 dB
PL40          0.00 dB
PL41          0.00 dB
PL42          0.00 dB
PL43          0.00 dB
PL44          0.00 dB
PL45          0.00 dB
PL46          0.00 dB
PL47          0.00 dB
PL48          0.00 dB
PL49          0.00 dB
PL50          0.00 dB
PL51          0.00 dB
PL52          0.00 dB
PL53          0.00 dB
PL54          0.00 dB
PL55          0.00 dB
PL56          0.00 dB
PL57          0.00 dB
PL58          0.00 dB
PL59          0.00 dB
PL60          0.00 dB
PL61          0.00 dB
PL62          0.00 dB
PL63          0.00 dB
PL64          0.00 dB
PL65          0.00 dB
PL66          0.00 dB
PL67          0.00 dB
PL68          0.00 dB
PL69          0.00 dB
PL70          0.00 dB
PL71          0.00 dB
PL72          0.00 dB
PL73          0.00 dB
PL74          0.00 dB
PL75          0.00 dB
PL76          0.00 dB
PL77          0.00 dB
PL78          0.00 dB
PL79          0.00 dB
PL80          0.00 dB
PL81          0.00 dB
PL82          0.00 dB
PL83          0.00 dB
PL84          0.00 dB
PL85          0.00 dB
PL86          0.00 dB
PL87          0.00 dB
PL88          0.00 dB
PL89          0.00 dB
PL90          0.00 dB
PL91          0.00 dB
PL92          0.00 dB
PL93          0.00 dB
PL94          0.00 dB
PL95          0.00 dB
PL96          0.00 dB
PL97          0.00 dB
PL98          0.00 dB
PL99          0.00 dB
PL100         0.00 dB
    
```

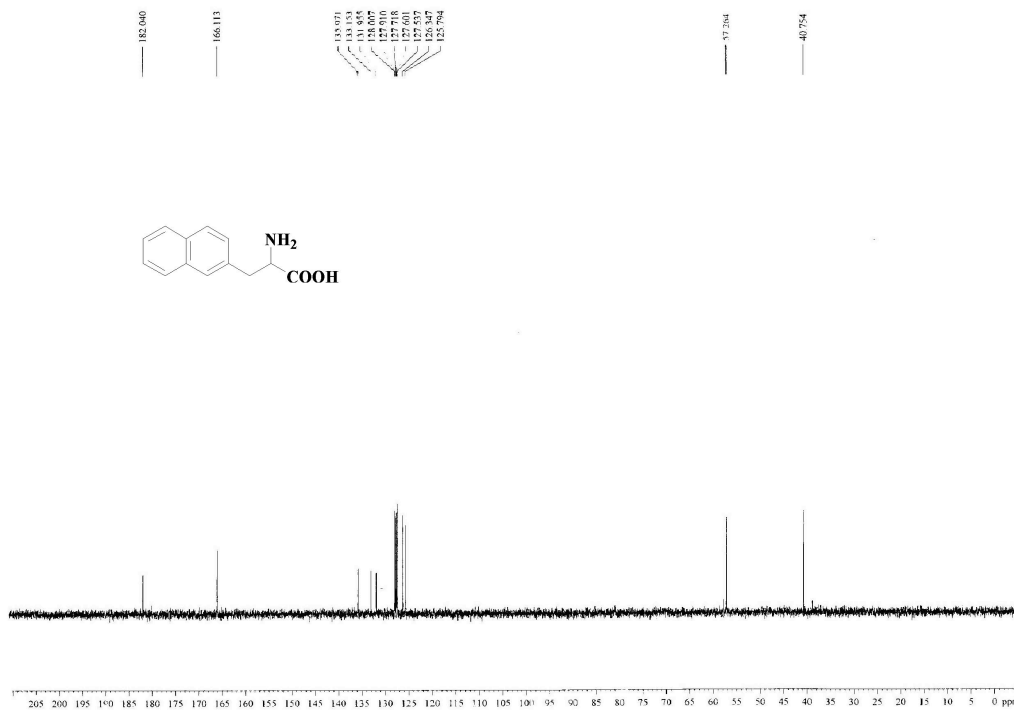

```

NAME          2011.0330
EXPNO         8
PROCNO        1
Date_         20110310
Time         16.25
INSTRUM       spect
PROBHD        5 mm PABBO BB-
PULPROG       zgpg30
TD            16384
SOLVENT       D2O
NS            4761
DS            0
SWH           19761.904 Hz
FIDRES       1.821652 Hz
AQ           0.2753012 sec
RG            2040
DW           16.800 usec
DE            6.50 usec
TE            298.0 K
D1            2.00000000 sec
D11           0.05000000 sec
TD0           1
    
```

```

===== CHANNEL f1 =====
NUC1          13C
P1            13C
PL1           9.20 usec
PL12          0.00 dB
PL13          0.00 dB
PL14          0.00 dB
PL15          0.00 dB
PL16          0.00 dB
PL17          0.00 dB
PL18          0.00 dB
PL19          0.00 dB
PL20          0.00 dB
PL21          0.00 dB
PL22          0.00 dB
PL23          0.00 dB
PL24          0.00 dB
PL25          0.00 dB
PL26          0.00 dB
PL27          0.00 dB
PL28          0.00 dB
PL29          0.00 dB
PL30          0.00 dB
PL31          0.00 dB
PL32          0.00 dB
PL33          0.00 dB
PL34          0.00 dB
PL35          0.00 dB
PL36          0.00 dB
PL37          0.00 dB
PL38          0.00 dB
PL39          0.00 dB
PL40          0.00 dB
PL41          0.00 dB
PL42          0.00 dB
PL43          0.00 dB
PL44          0.00 dB
PL45          0.00 dB
PL46          0.00 dB
PL47          0.00 dB
PL48          0.00 dB
PL49          0.00 dB
PL50          0.00 dB
PL51          0.00 dB
PL52          0.00 dB
PL53          0.00 dB
PL54          0.00 dB
PL55          0.00 dB
PL56          0.00 dB
PL57          0.00 dB
PL58          0.00 dB
PL59          0.00 dB
PL60          0.00 dB
PL61          0.00 dB
PL62          0.00 dB
PL63          0.00 dB
PL64          0.00 dB
PL65          0.00 dB
PL66          0.00 dB
PL67          0.00 dB
PL68          0.00 dB
PL69          0.00 dB
PL70          0.00 dB
PL71          0.00 dB
PL72          0.00 dB
PL73          0.00 dB
PL74          0.00 dB
PL75          0.00 dB
PL76          0.00 dB
PL77          0.00 dB
PL78          0.00 dB
PL79          0.00 dB
PL80          0.00 dB
PL81          0.00 dB
PL82          0.00 dB
PL83          0.00 dB
PL84          0.00 dB
PL85          0.00 dB
PL86          0.00 dB
PL87          0.00 dB
PL88          0.00 dB
PL89          0.00 dB
PL90          0.00 dB
PL91          0.00 dB
PL92          0.00 dB
PL93          0.00 dB
PL94          0.00 dB
PL95          0.00 dB
PL96          0.00 dB
PL97          0.00 dB
PL98          0.00 dB
PL99          0.00 dB
PL100         0.00 dB
    
```

liushouxin-HJN

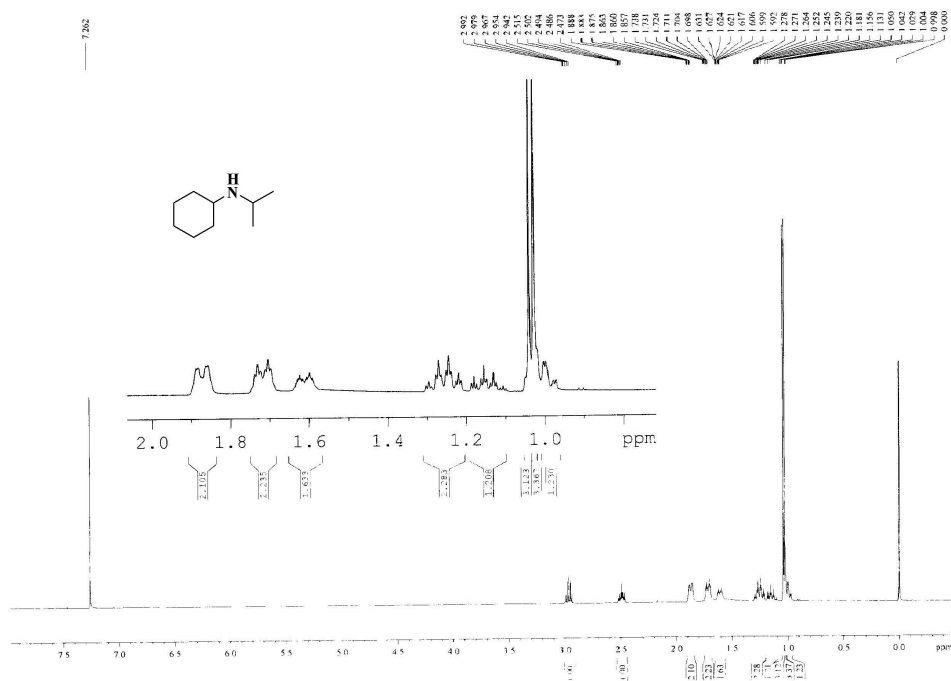

```

NAME      2010.0624
EXPNO    5
PROCNO   1
Date_    20100624
Time     11.46
INSTRUM  spect
PROBHD   5 mm PABBO BB-
PULPROG  zg30
TD       32768
SOLVENT  CDCl3
NS       16
DS       0
SWH      5000.000 Hz
FIDRES   0.152588 Hz
AQ       3.2768500 sec
RG       406
DW       100.000 usec
DE       6.50 usec
TE       299.2 K
D1       1.0000000 sec
TDO      1

===== CHANNEL f1 =====
NUC1     1H
P1       9.80 usec
PL1      0.00 dB
PL1W     26.62599564 W
SFO1     500.132005 MHz
SI       65536
SF       500.1300126 MHz
WDW      EM
SSB      0
LB       0.30 Hz
GB       0
PC       1.00
    
```

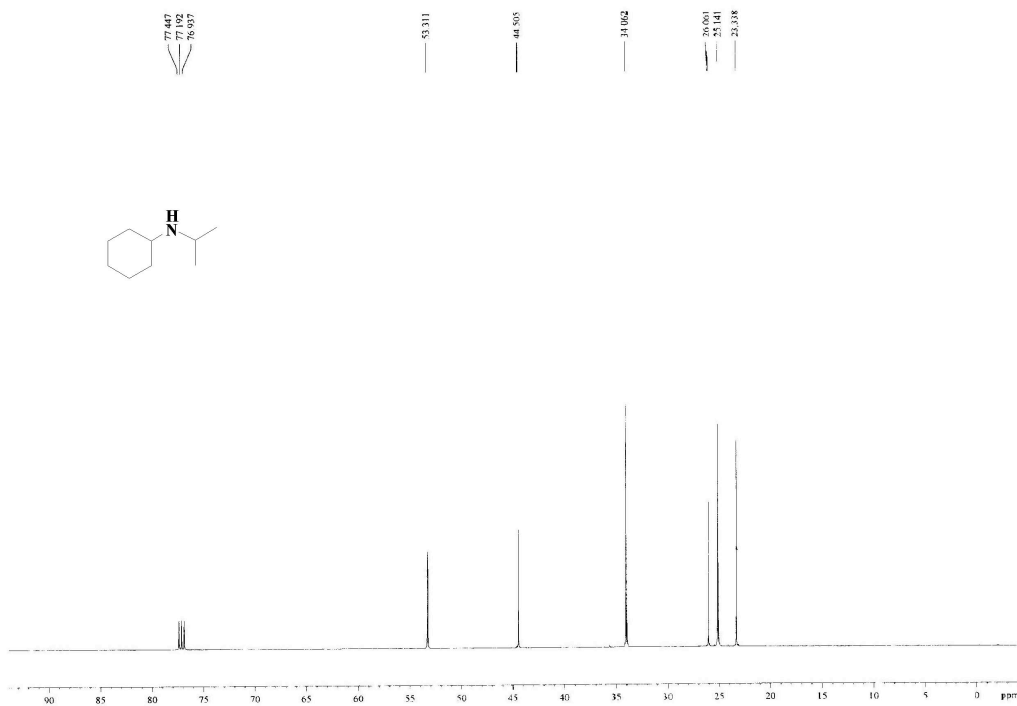

```

NAME      2010.0612
EXPNO    3
PROCNO   1
Date_    20100612
Time     12.51
INSTRUM  spect
PROBHD   5 mm PABBO BB-
PULPROG  zgpg30
TD       65536
SOLVENT  CDCl3
NS       4
DS       4
SWH      32694.738 Hz
FIDRES   0.501934 Hz
AQ       0.9961972 sec
RG       406
DW       15.200 usec
DE       6.50 usec
TE       299.2 K
D1       2.0000000 sec
D11      0.0300000 sec
TDO      0

===== CHANNEL f1 =====
NUC1     13C
P1       9.25 usec
PL1      3.00 dB
PL1W     47.46148483 W
SFO1     125.7627918 MHz

===== CHANNEL f2 =====
CDPRG2   waltz16
NUC2     1H
PCPD2    80.00 usec
PE2      0.00 dB
PE12     15.00 dB
PL13     17.50 dB
PL1W     26.62599564 W
PL1W     0.41620368 W
SFO2     500.132005 MHz
SI       32768
SF       125.7577898 MHz
WDW      EM
SSB      0
LB       1.00 Hz
GB       0
PC       1.40
    
```

liushouxin-N-DJBJA

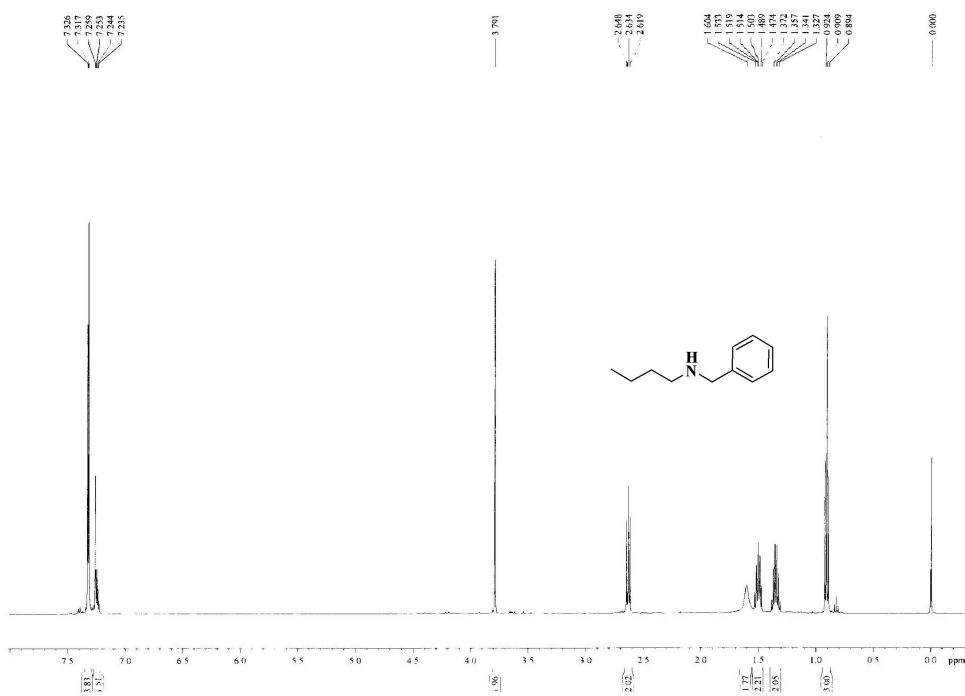

```

NAME      2010.0624
EXPNO    1
PROCNO    1
Date_     20100624
Time      10.03
INSTRUM   spect
PROBHD    5 mm PABBO BB-
PULPROG   zg30
TD         32768
SOLVENT   CDCl3
NS         8
DS         0
SWH        5000.000 Hz
FIDRES    0.152588 Hz
AQ         3.2768500 sec
RG         287
DW         100.000 usec
DE         6.50 usec
TE         298.0 K
D1         1.00000000 sec
TD0        1
    
```

```

===== CHANNEL f1 =====
NUC1      1H
P1         9.80 usec
PL1        0.00 dB
PL1W      26.62599564 W
SFO1      500.1322306 MHz
SI         65536
SF         500.1300142 MHz
WDW        EM
SSB         0
LB         0.30 Hz
GB         0
PC         1.00
    
```

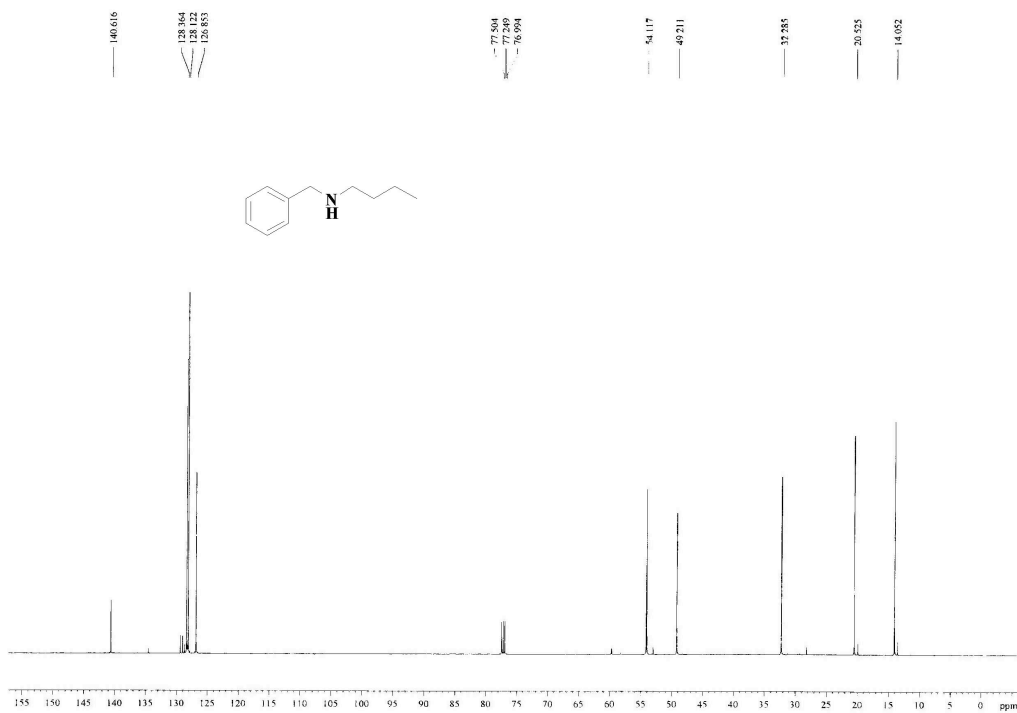

```

NAME      2010.0611
EXPNO    2
PROCNO    1
Date_     20100611
Time      8.22
INSTRUM   spect
PROBHD    5 mm PABBO BB-
PULPROG   zgpg30
TD         65536
SOLVENT   CDCl3
NS         896
DS         0
SWH        32894.738 Hz
FIDRES    0.501938 Hz
AQ         0.9961972 sec
RG         7050
DW         15.200 usec
DE         6.50 usec
TE         299.5 K
D1         2.00000000 sec
D11        0.03000000 sec
TD0        1
    
```

```

===== CHANNEL f1 =====
NUC1      13C
P1         9.20 usec
PL1        3.00 dB
PL1W      47.46148682 W
SFO1      125.7728799 MHz

===== CHANNEL f2 =====
CPDPRG2   waltz16
NUC2      1H
SCPR2     80.00 usec
P12        0.00 dB
PL12       18.00 dB
PL13       17.50 dB
PL1W      26.62599564 W
SFO2W     0.41629368 W
PL13W     0.47348461 W
SFO2      500.1320005 MHz
SI         32768
SF         125.7577890 MHz
WDW        RM
SSB         0
LB         1.00 Hz
GB         0
PC         1.40
    
```

liushouxin-N-YJBA

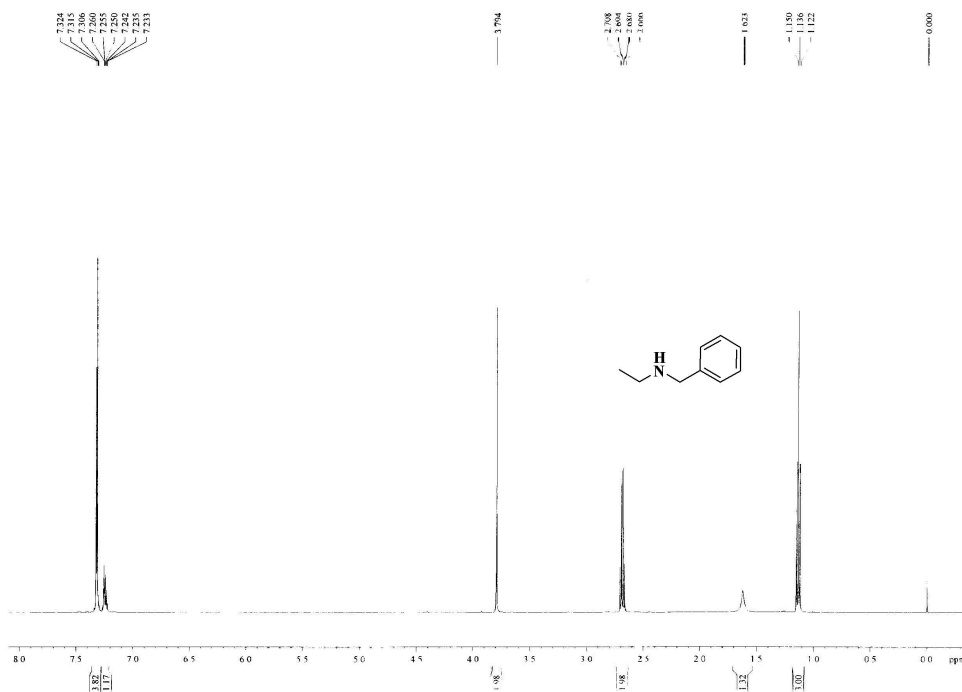

```

NAME      2010.0621
EXPNO    9
PROCNO   1
Date_    20100621
Time     12.07
INSTRUM  spect
PROBHD   5 mm FAPBO BB-
PULPROG  zg30
TD        32768
SOLVENT  CDCl3
NS        8
DS        0
SWH      5000.000 Hz
FIDRES   0.152588 Hz
AQ       3.2768500 sec
RG        161
DW       100.000 usec
DE       6.50 usec
TE       298.9 K
D1       1.0000000 sec
D11      1
TDO      1
    
```

```

===== CHANNEL f1 =====
NUC1     1H
P1       9.80 usec
PL1      0.00 dB
PL1W    26.62599564 W
SF       500.1322506 MHz
SI       65536
SF       500.1300158 MHz
WDW      EM
SSB      0
LB       0.30 Hz
GB       0
PC       1.00
    
```

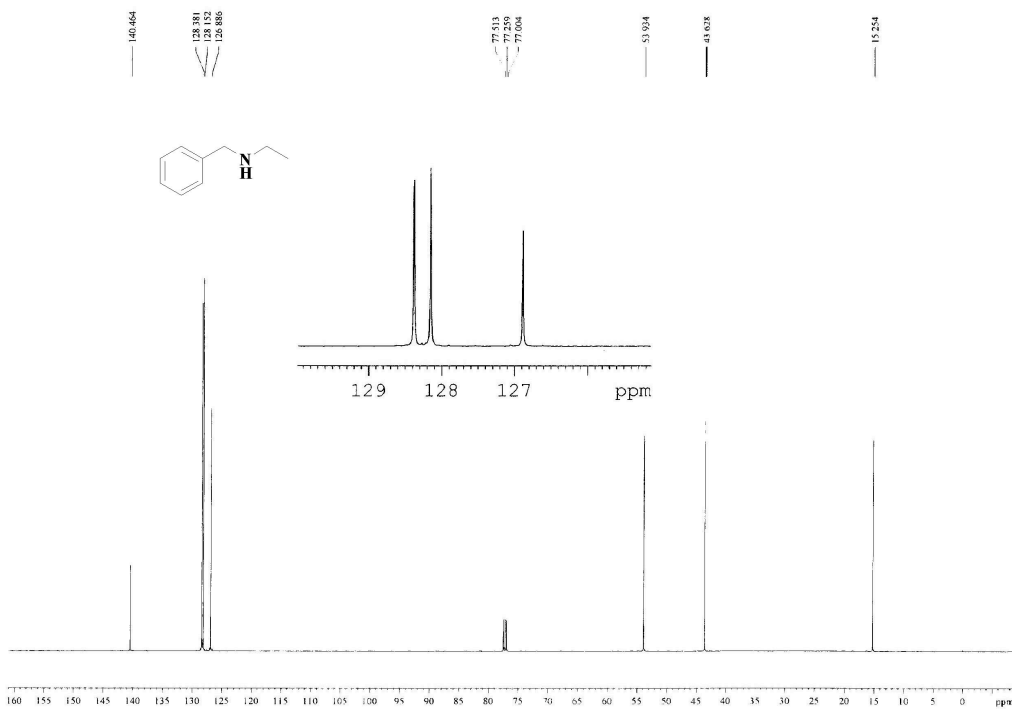

```

NAME      2010.0611
EXPNO    5
PROCNO   2
Date_    20100611
Time     9.05
INSTRUM  spect
PROBHD   5 mm FAPBO BB-
PULPROG  zgpg30
TD        65536
SOLVENT  CDCl3
NS        8
DS        0
SWH      32894.738 Hz
FIDRES   0.501934 Hz
AQ       0.5961872 sec
RG        2050
DW       15.200 usec
DE       6.50 usec
TE       299.4 K
D1       1.0000000 sec
D11      0.0300000 sec
TDO      1
    
```

```

===== CHANNEL f1 =====
NUC1     13C
P1       9.20 usec
PL1      3.00 dB
PL1W    87.4618682 W
SF       125.7728799 MHz
===== CHANNEL f2 =====
CPDPRG2  waltz16
NUC2     1H
PCPD2    80.00 usec
PL2      0.00 dB
PL2W    18.06 dB
PL3      17.50 dB
PL3W    26.62599564 W
PL4W    0.41620368 W
SF       0.47348461 MHz
SFO2    500.1320005 MHz
SI       32768
SF       125.7577880 MHz
WDW      EM
SSB      0
LB       1.00 Hz
GB       0
PC       1.40
    
```

Liushouxin-BBA

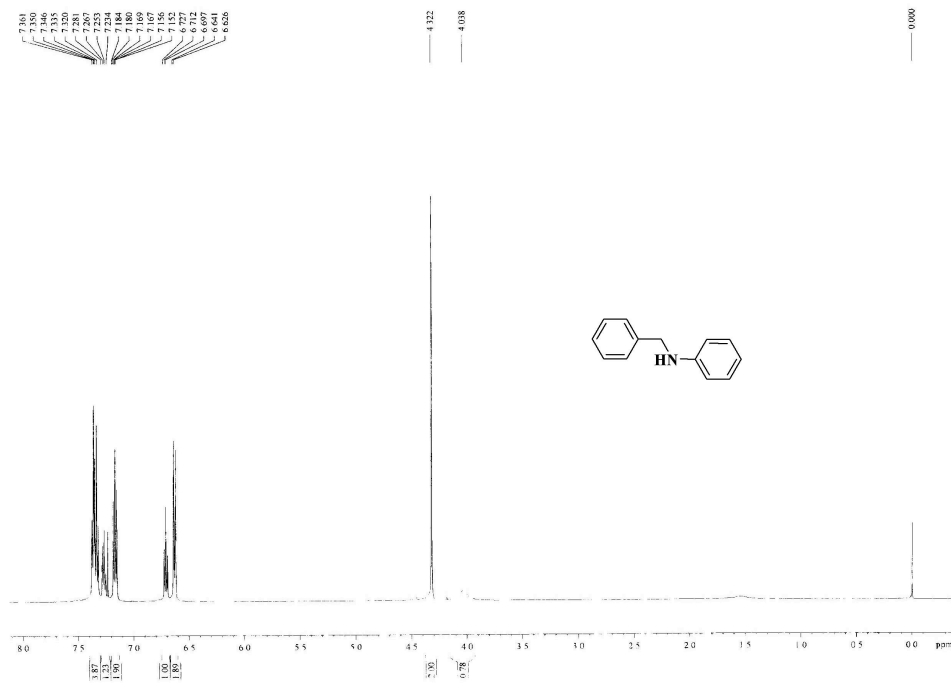

```

NAME      2010.0621
EXPNO    3
PROCNO   1
Date_    20100621
Time     10.07
INSTRUM  spect
PROBHD   5 mm PABBO BB-
PULPROG  zg30
TD       32768
SOLVENT  CDCl3
NS       8
DS       0
SWH      5000.000 Hz
FIDRES   0.152588 Hz
AQ       3.2768500 sec
RG       203
DW       100.000 usec
DE       6.50 usec
TE       298.0 K
DI       1.00000000 sec
TD0      1
    
```

```

===== CHANNEL f1 =====
NUC1      1H
P1        9.80 usec
PL1       0.00 dB
PL12      26.62599564 W
SFO1      500.1322506 MHz
SI        65536
SF        500.1300266 MHz
WDW       EM
SSB       0
LB        0.30 Hz
GB        0
PC        1.00
    
```

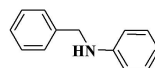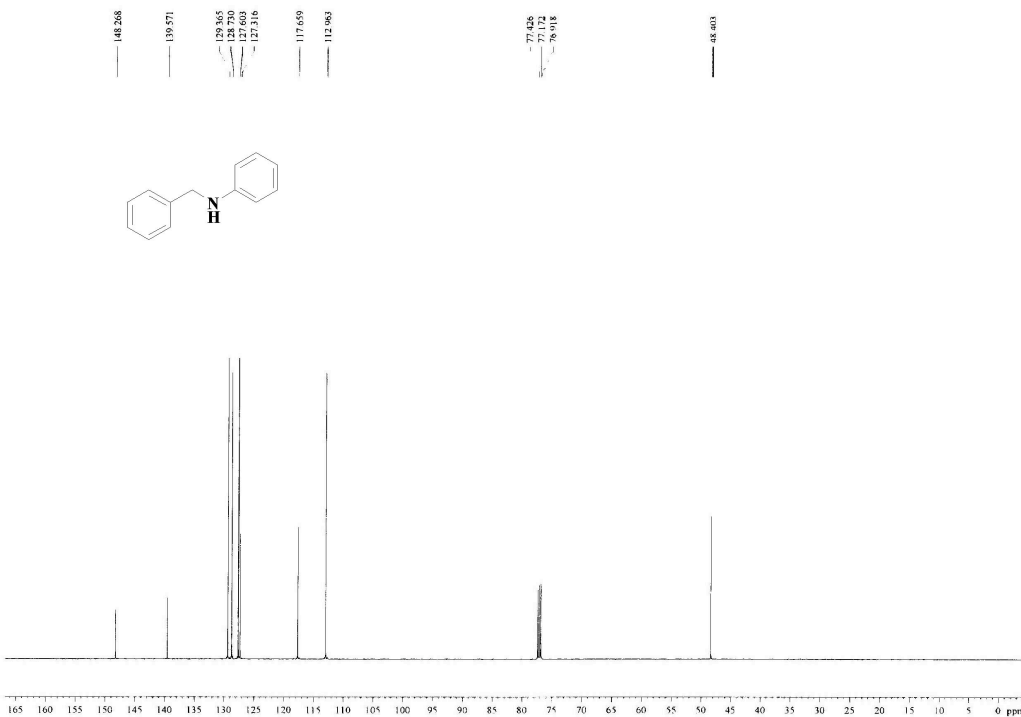

```

NAME      2010.0612
EXPNO    18
PROCNO   1
Date_    20100612
Time     17.28
INSTRUM  spect
PROBHD   5 mm PABBO BB-
PULPROG  zgpg30
TD       65536
SOLVENT  CDCl3
NS       12
DS       0
SWH      29761.804 Hz
FIDRES   0.454131 Hz
AQ       1.1010548 sec
RG       2090
DW       16.800 usec
DE       6.50 usec
TE       300.4 K
DI       2.00000000 sec
DI1      0.03000000 sec
TD0      1
    
```

```

===== CHANNEL f1 =====
NUC1      13C
P1        9.20 usec
PL1       3.00 dB
PL12      47.46148462 W
SFO1      125.7703643 MHz

===== CHANNEL f2 =====
CPDPRG2  waltz16
NUC2      1H
PCPD2    80.00 usec
PL2       0.00 dB
PL12     18.00 dB
PL13     17.50 dB
PC12W    24.62599564 W
PL12W    0.41620368 W
PL13W    0.47348461 W
SFO2     500.1320005 MHz
SI       32768
SF       125.7577690 MHz
WDW       EM
SSB       0
LB        1.00 Hz
GB        0
PC        1.40
    
```

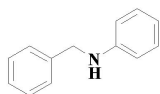

liushouxin-EBA

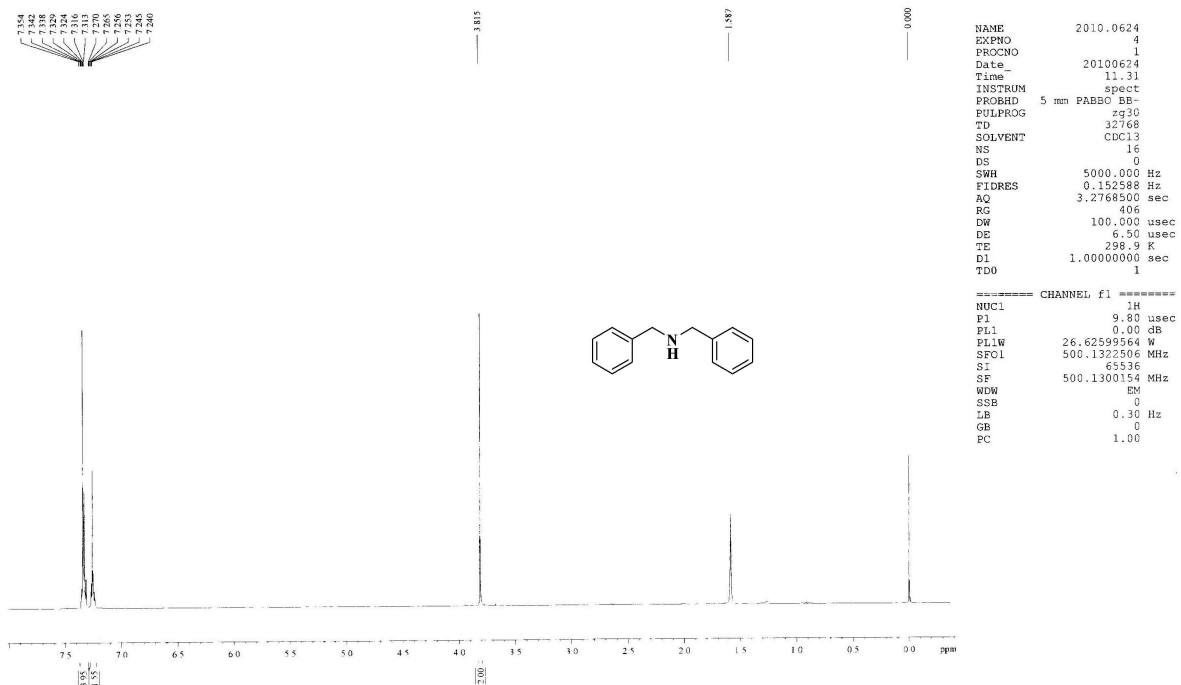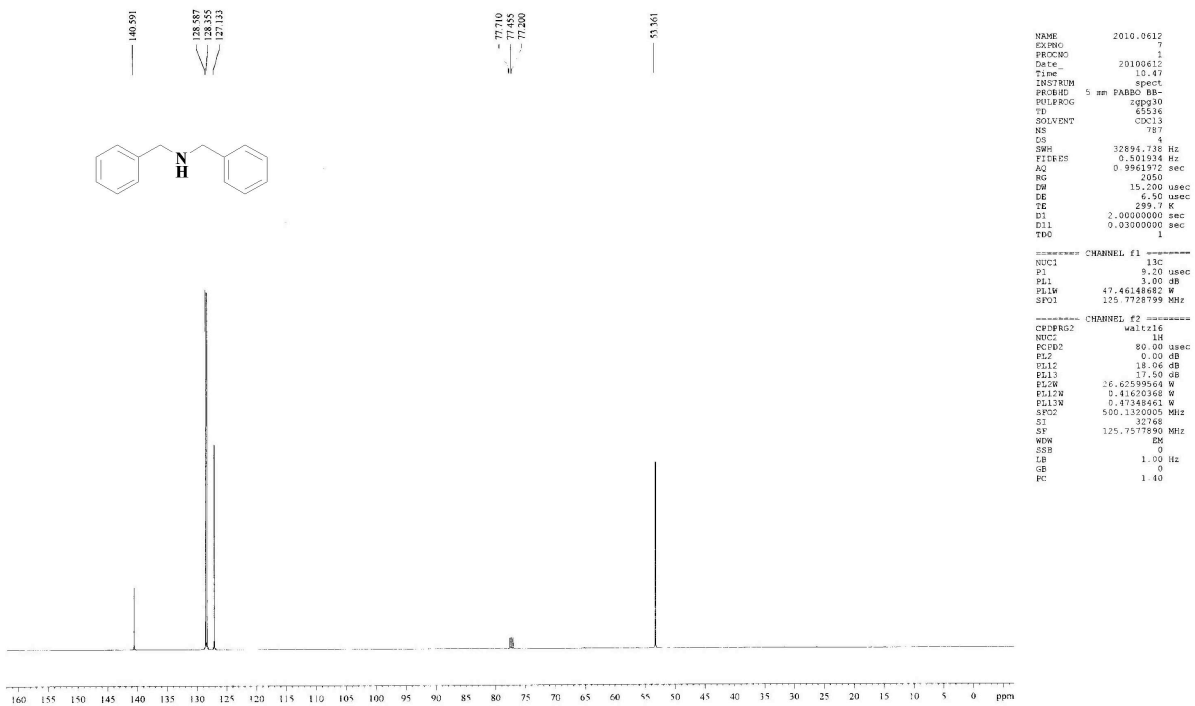

liushouxin-14683-47-7

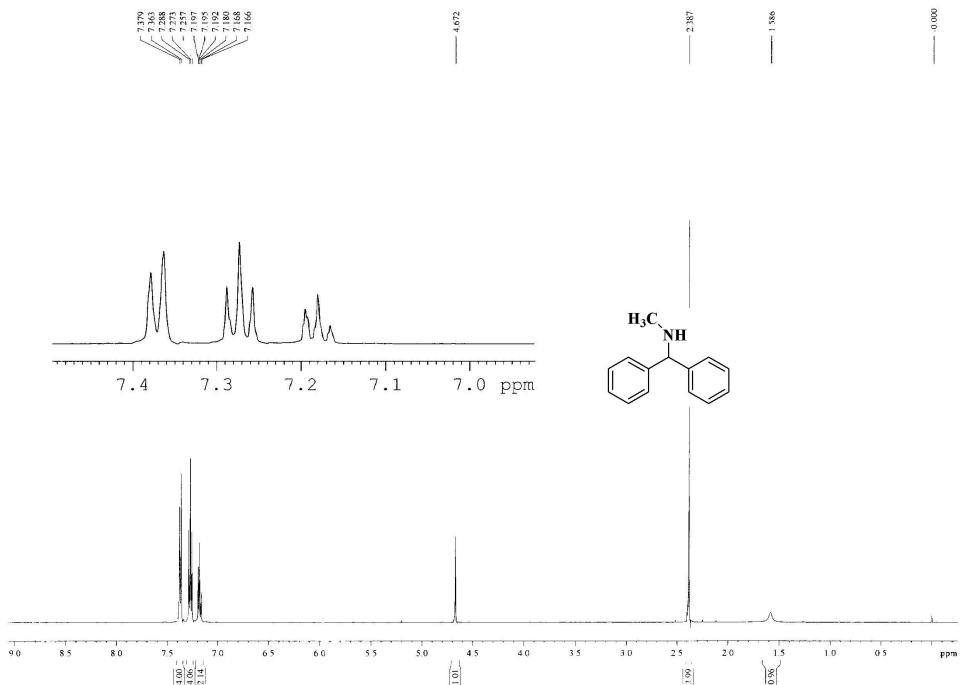

```

NAME      2010.0406
EXPNO     5
PROCNO    1
Date_     20100406
Time      11.16
INSTRUM   spect
PROBHD    5 mm PABBO BB-
PULPROG   zg30
TD         32768
SOLVENT   CDCl3
NS         1
DS         0
SWH        7500.000 Hz
FIDRES     0.228892 Hz
AQ         2.1845834 sec
RG         1
DW         66.667 usec
DE         6.50 usec
TE         298.0 K
D1         1.00000000 sec
TD0        1
===== CHANNEL f1 =====
NUC1      1H
P1         9.80 usec
PL1        0.00 dB
PL1W       26.6259564 W
SFO1       500.1322506 MHz
SI         32768
SF         500.1300474 MHz
WDW        EM
SSB         0
LB         0.00 Hz
GB         0
PC         1.00
    
```

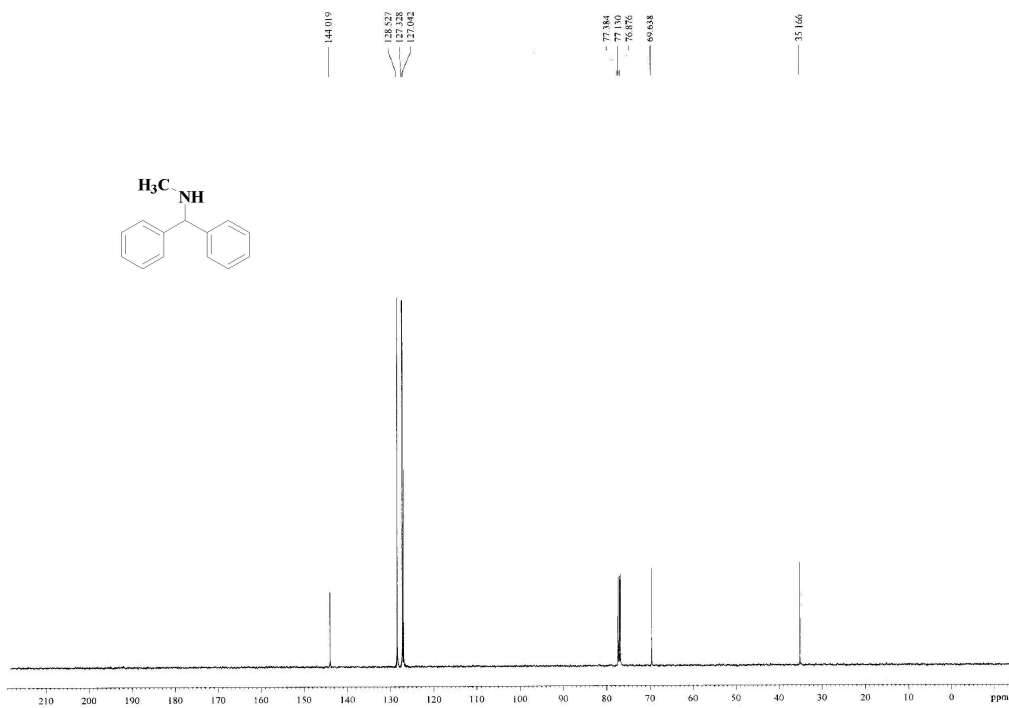

```

NAME      2010.0406
EXPNO     5
PROCNO    1
Date_     20100406
Time      11.25
INSTRUM   spect
PROBHD    5 mm PABBO BB-
PULPROG   zgpg30
TD         16384
SOLVENT   CDCl3
NS         64
DS         0
SWH        79761.904 Hz
FIDRES     1.816322 Hz
AQ         0.2753012 sec
RG         2050
DW         16.490 usec
DE         6.50 usec
TE         298.1 K
D1         2.00000000 sec
D11        0.03000000 sec
TD0        1
===== CHANNEL f1 =====
NUC1      13C
P1         9.20 usec
PL1         3.00 dB
PL1W       47.46188682 W
SFO1       125.7702643 MHz
===== CHANNEL f2 =====
CPDPRG2   waltz16
NUC2      1H
PCPD2     80.00 usec
PL2        0.00 dB
PL2W       16.04 dB
PL3        17.50 dB
PL3W       26.6259564 W
PL1W       0.41620368 W
PL2W       9.47348461 W
SFO2       500.1300025 MHz
SI         32768
SF         125.7577890 MHz
WDW        EM
SSB         0
LB         3.00 Hz
GB         0
PC         1.40
    
```



liushouxin-m

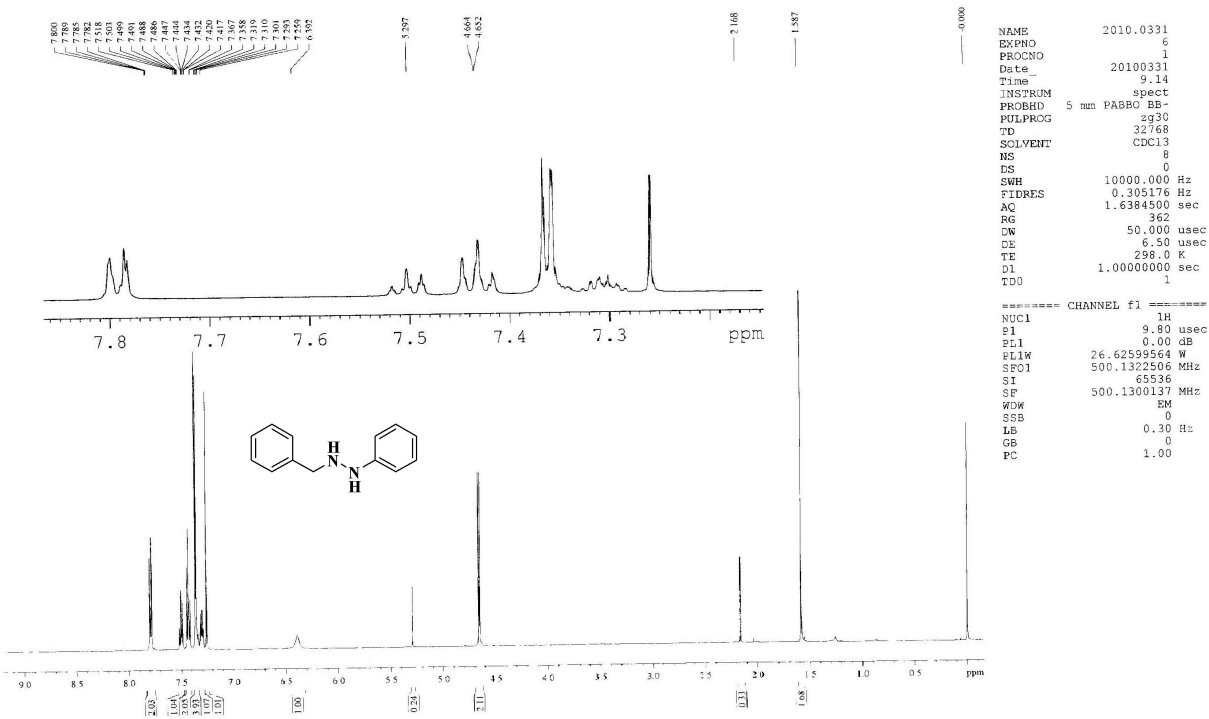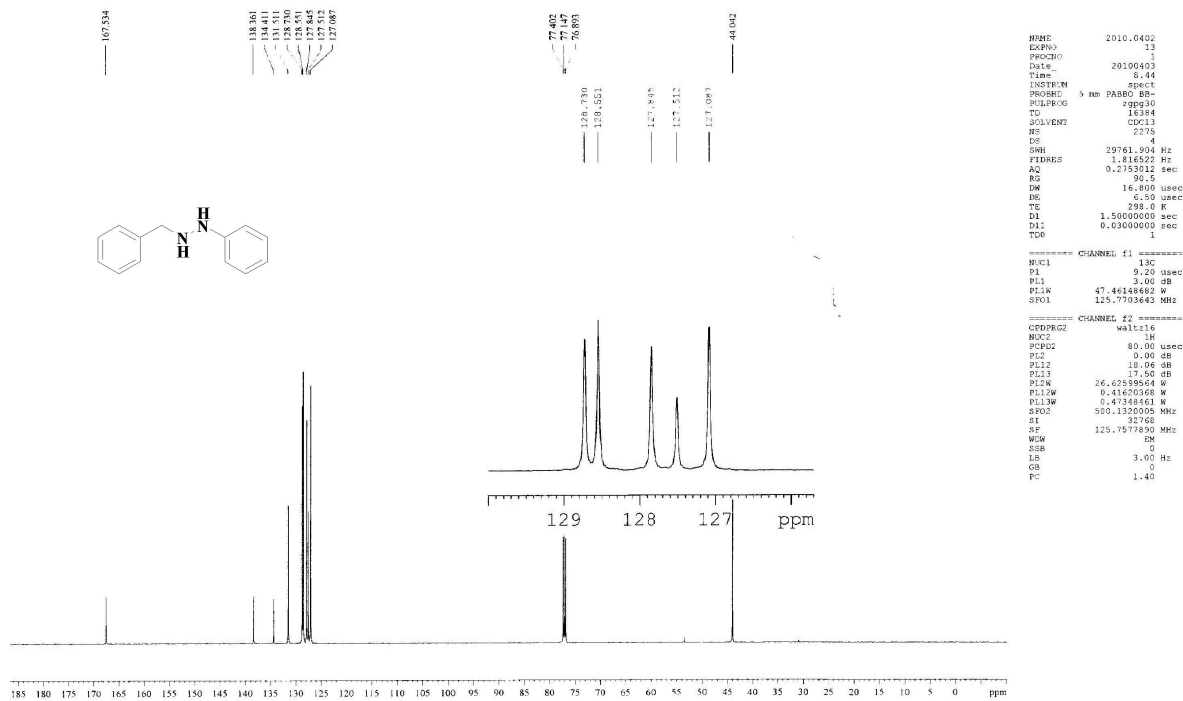

liushouxin-1,6-JEA

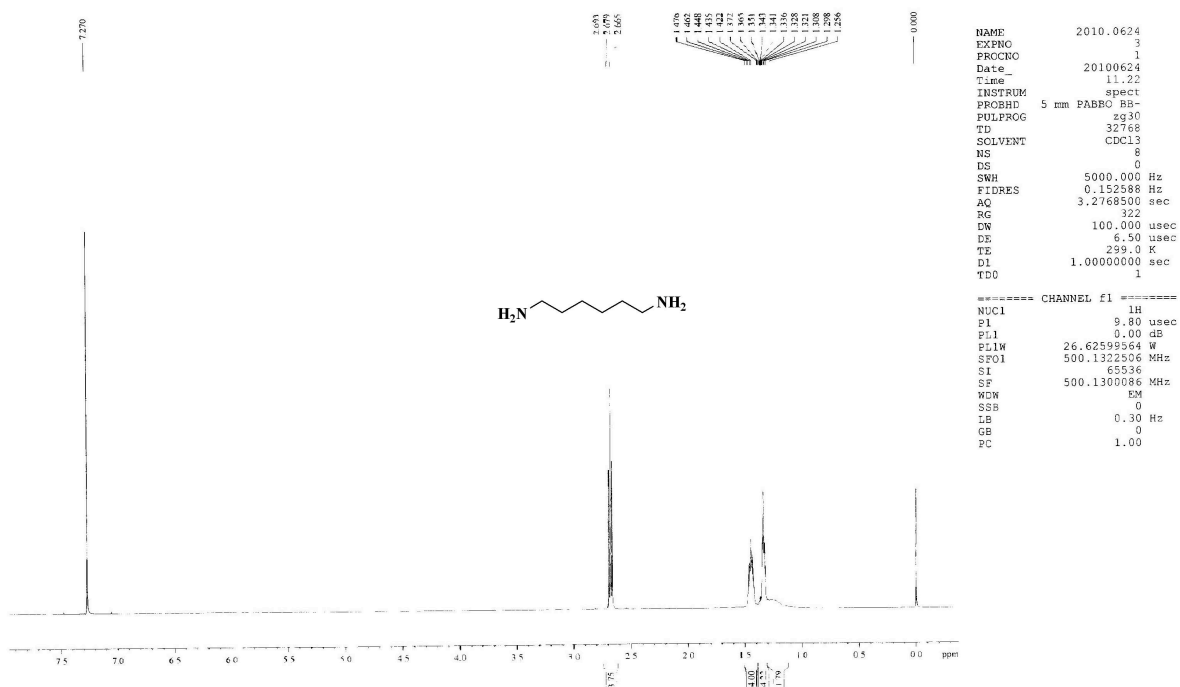

liushouxin-1,6-JEA

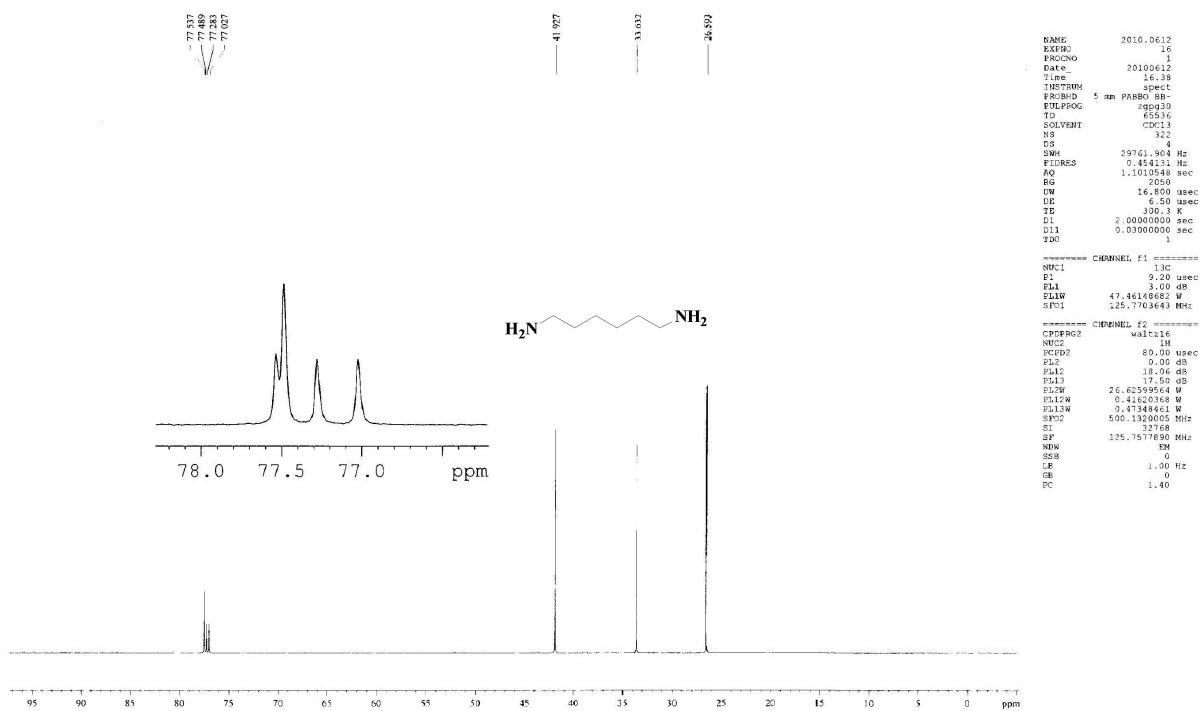

liushouxin-2-BYA

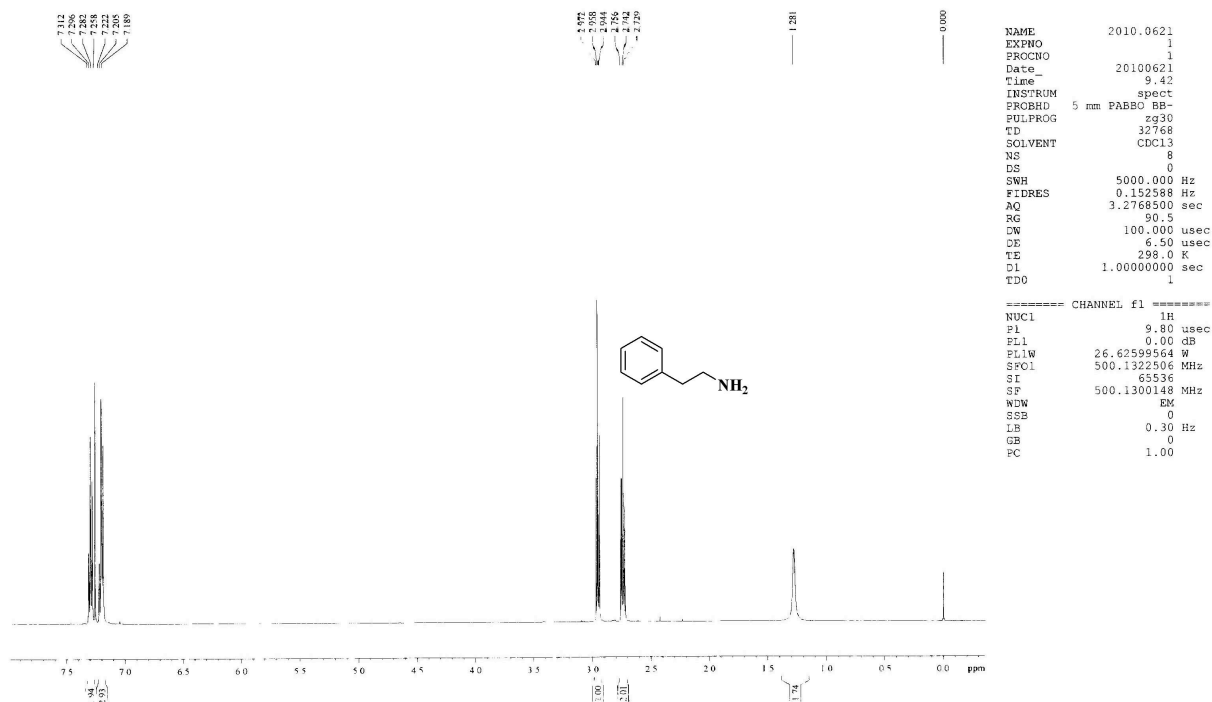

liushouxin-BYA-C

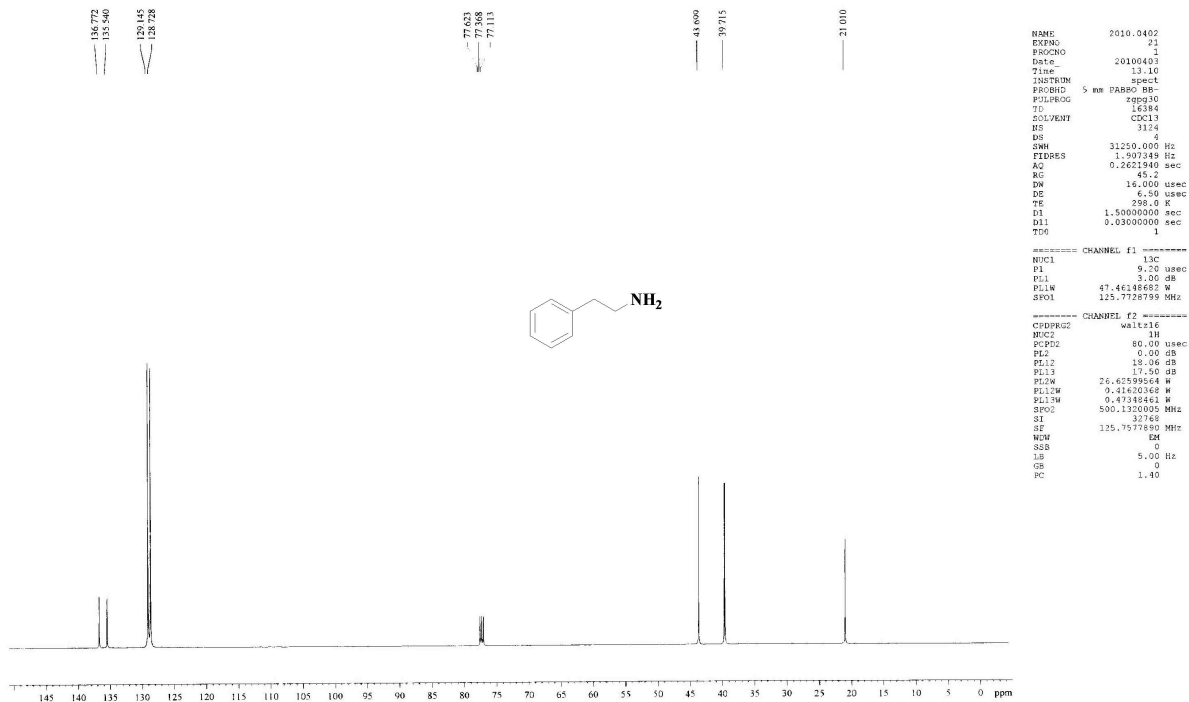

liushouxin-BYA

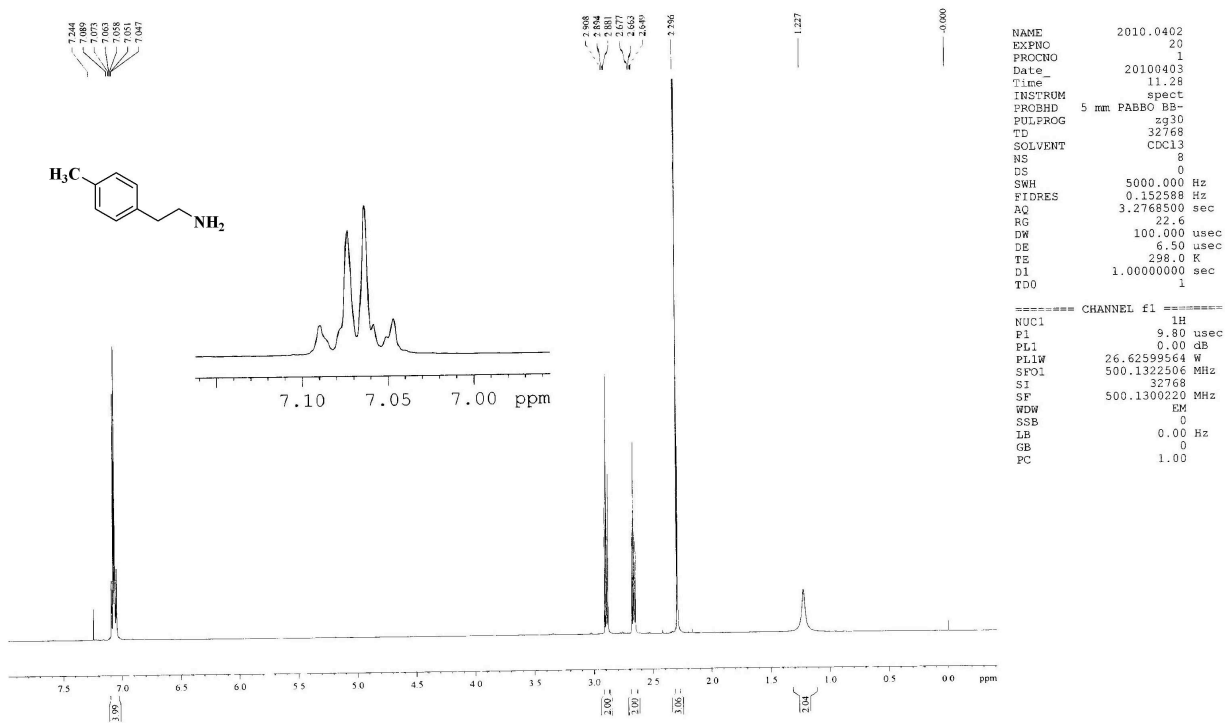

liushouxin-BYA-C

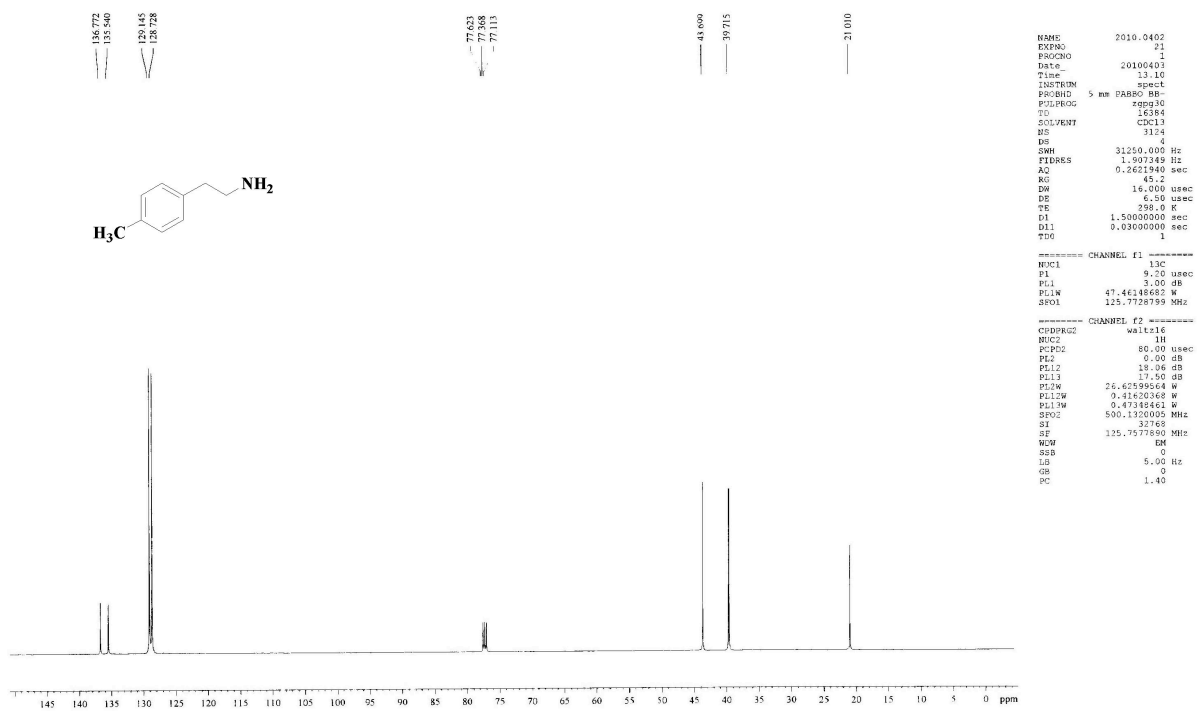

liushouxin-BA

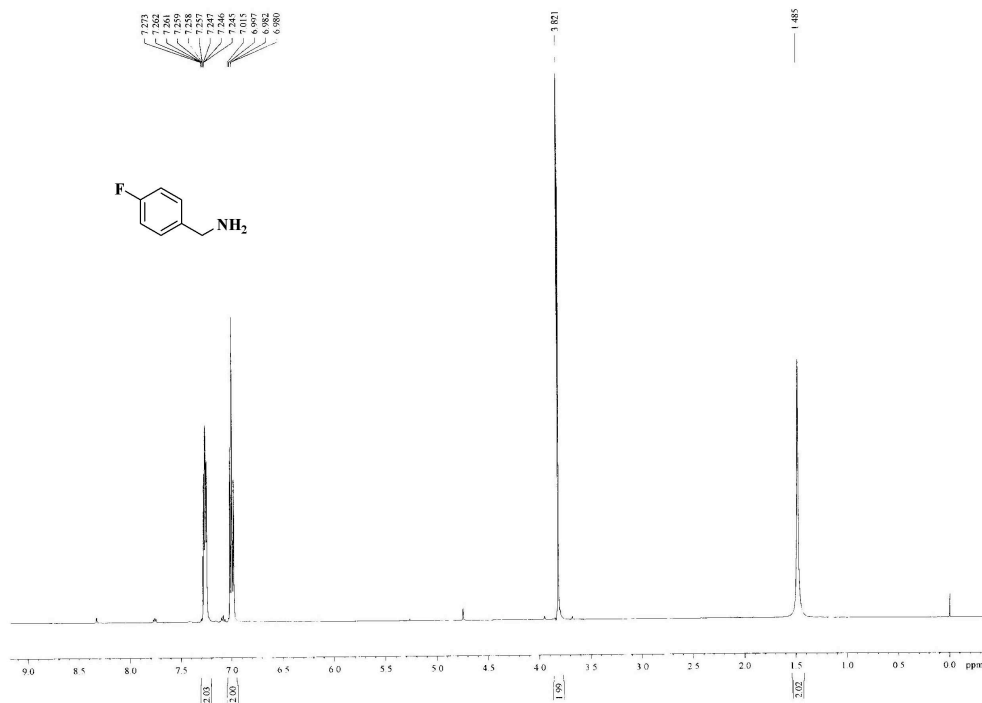

```

NAME      2010.0403
EXPNO     1
PROCNO    1
Date_     20100403
Time      15.10
INSTRUM   spect
PROBHD    5 mm PABBO BB-
PULPROG   zg30
TD         32768
SOLVENT   CDCl3
NS         4
DS         0
SWH        5000.000 Hz
FIDRES     0.152588 Hz
AQ         3.2768500 sec
RG         5
DW         100.000 usec
DE         6.50 usec
TE         298.0 K
D1         1.00000000 sec
TD0        1
    
```

```

===== CHANNEL f1 =====
NUC1      1H
P1         9.80 usec
PL1        0.00 dB
PL1W      26.6259564 W
SFO1      500.132506 MHz
SI         32768
SF         500.1300016 MHz
WDW        EM
SSB         0
LB          0.00 Hz
GB          0
PC          1.00
    
```

liushouxin-BA-C

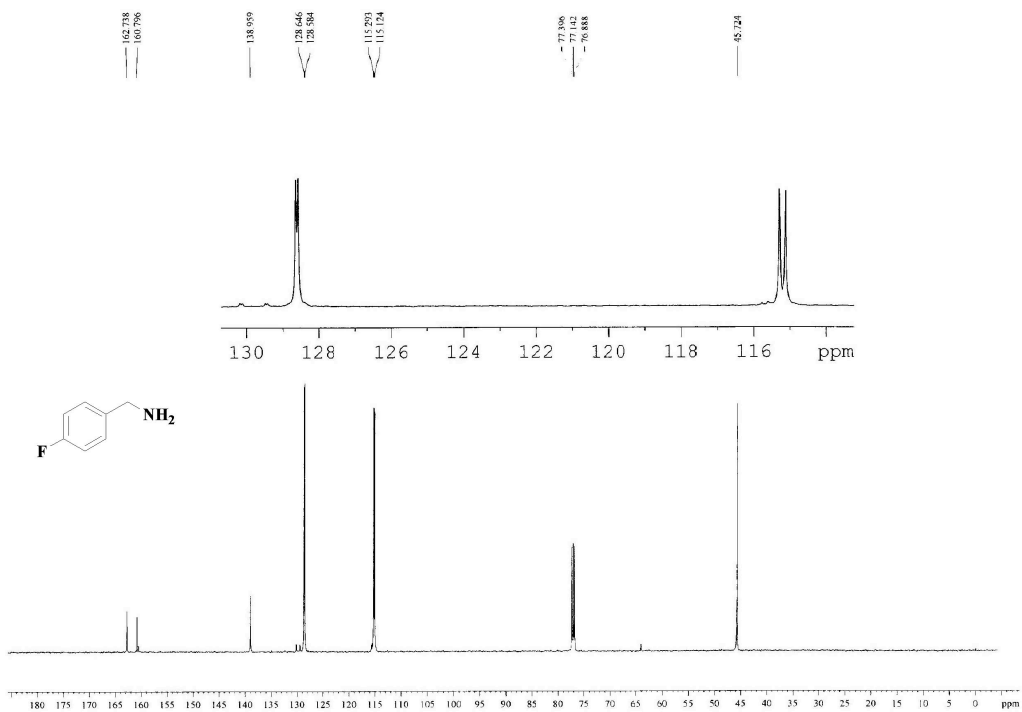

```

NAME      2010.0403
EXPNO     2
PROCNO    1
Date_     20100403
Time      15.20
INSTRUM   spect
PROBHD    5 mm PABBO BB-
PULPROG   zgpg30
TD         16384
SOLVENT   CDCl3
NS         2
DS         2
SWH        31250.000 Hz
FIDRES     1.907349 Hz
AQ         0.2621940 sec
RG         45.2
DW         16.000 usec
DE         6.50 usec
TE         298.0 K
D1         1.50000000 sec
D11        0.03000000 sec
TD0        1
    
```

```

===== CHANNEL f1 =====
NUC1      13C
P1         9.20 usec
PL1        5.00 dB
PL1W      47.4614882 W
SFO1      125.7728799 MHz
    
```

```

===== CHANNEL f2 =====
CPDPRG2   waltz16
NUC2      1H
PCPD2     80.00 usec
PL2        0.00 dB
PL12       17.50 dB
PL1W      26.6259564 W
SFO2      500.1320005 MHz
SI         32768
SF         125.7577890 MHz
WDW        EM
SSB         0
LB          5.00 Hz
GB          0
PC          1.40
    
```
